# Supplementary material for: NOTCH localizes to mitochondria through the TBC1D15-FIS1 interaction and is stabilized via blockade of E3 ligase and CDK8 recruitment to reprogram tumor-initiating cells
Source: Springer Nature journal article supplement (doi:10.1038/s12276-024-01174-6), 2024-02-27

### Figure 1b

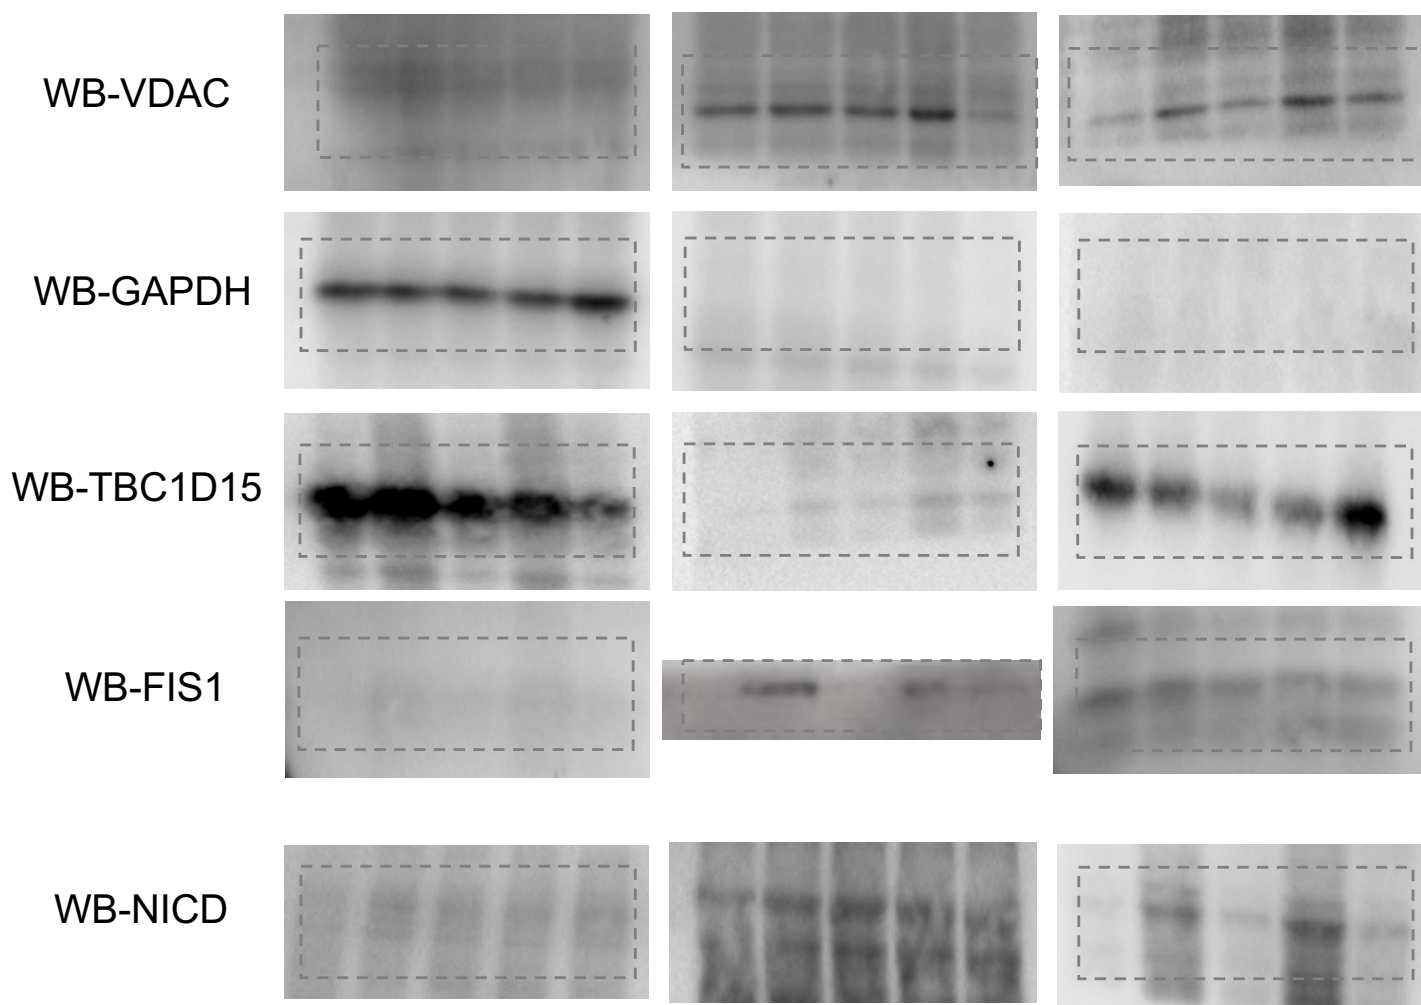

### Figure 3C

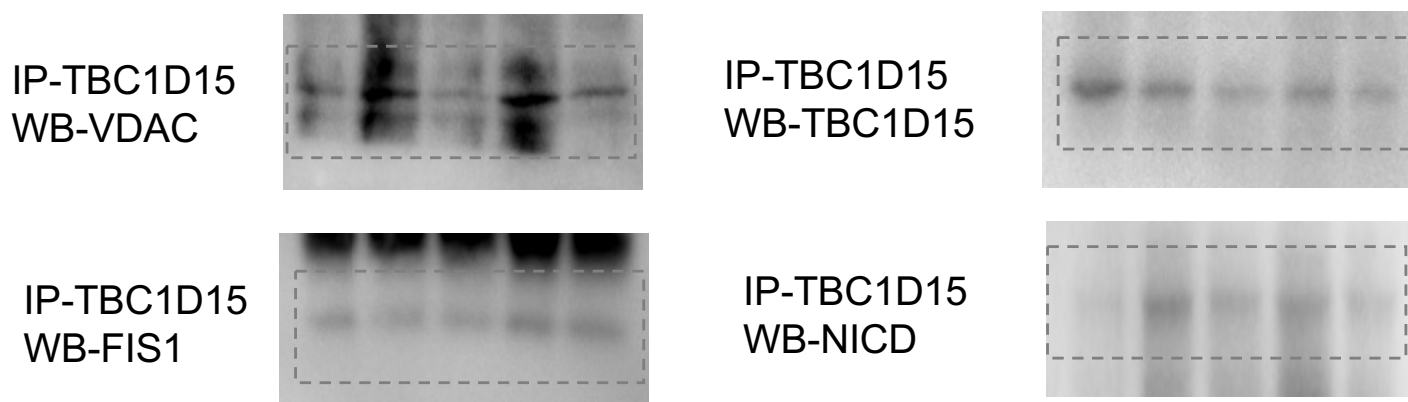

**Figure 2a**

WB- p-NUMB  
;CD133+ TICs

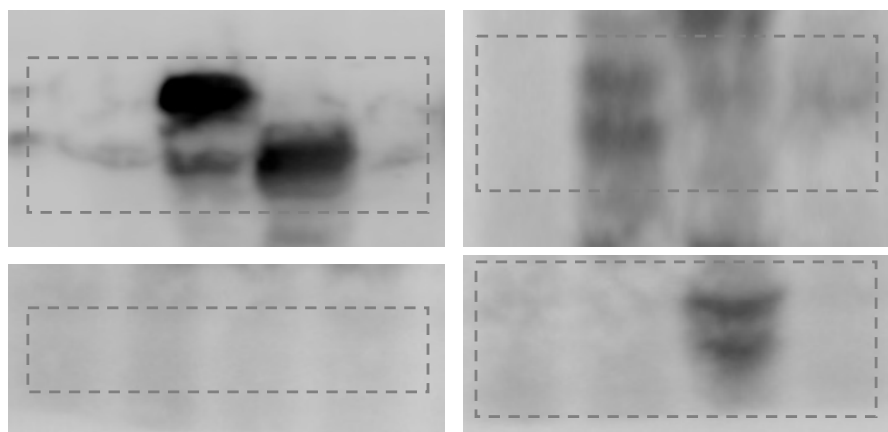

WB- NUMB  
;CD133+ TICs

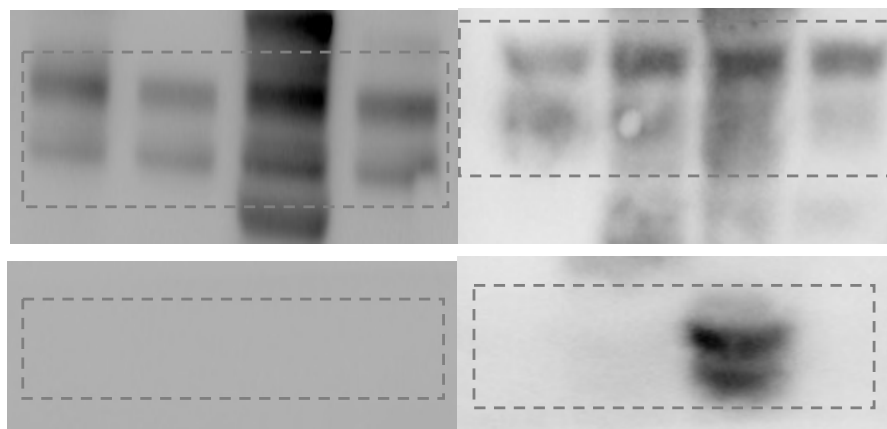

WB- p-NUMB  
;CD133- TICs

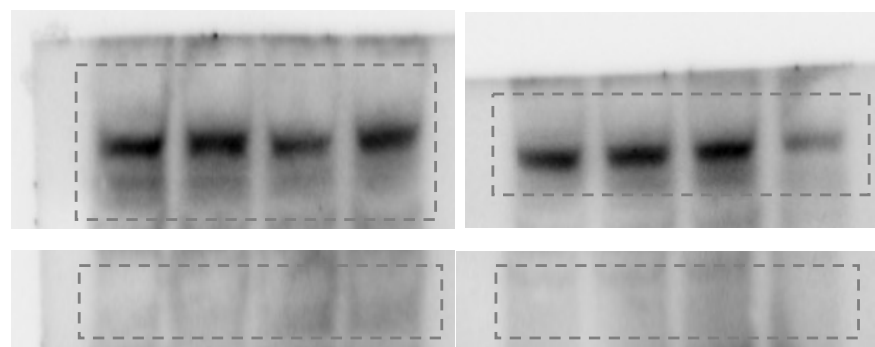

WB- NUMB  
;CD133- TICs

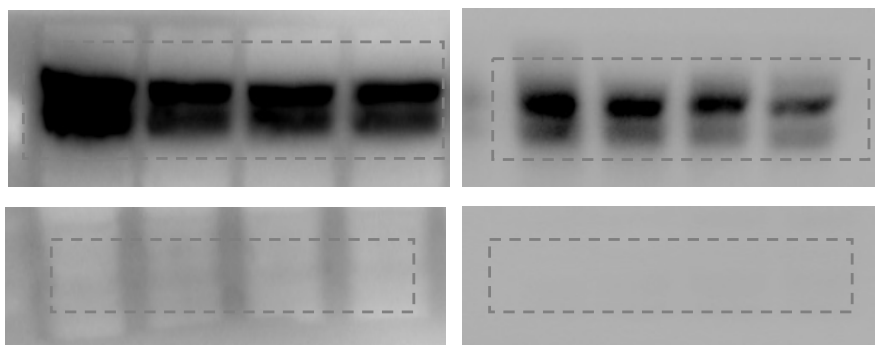

**Figure 2c**

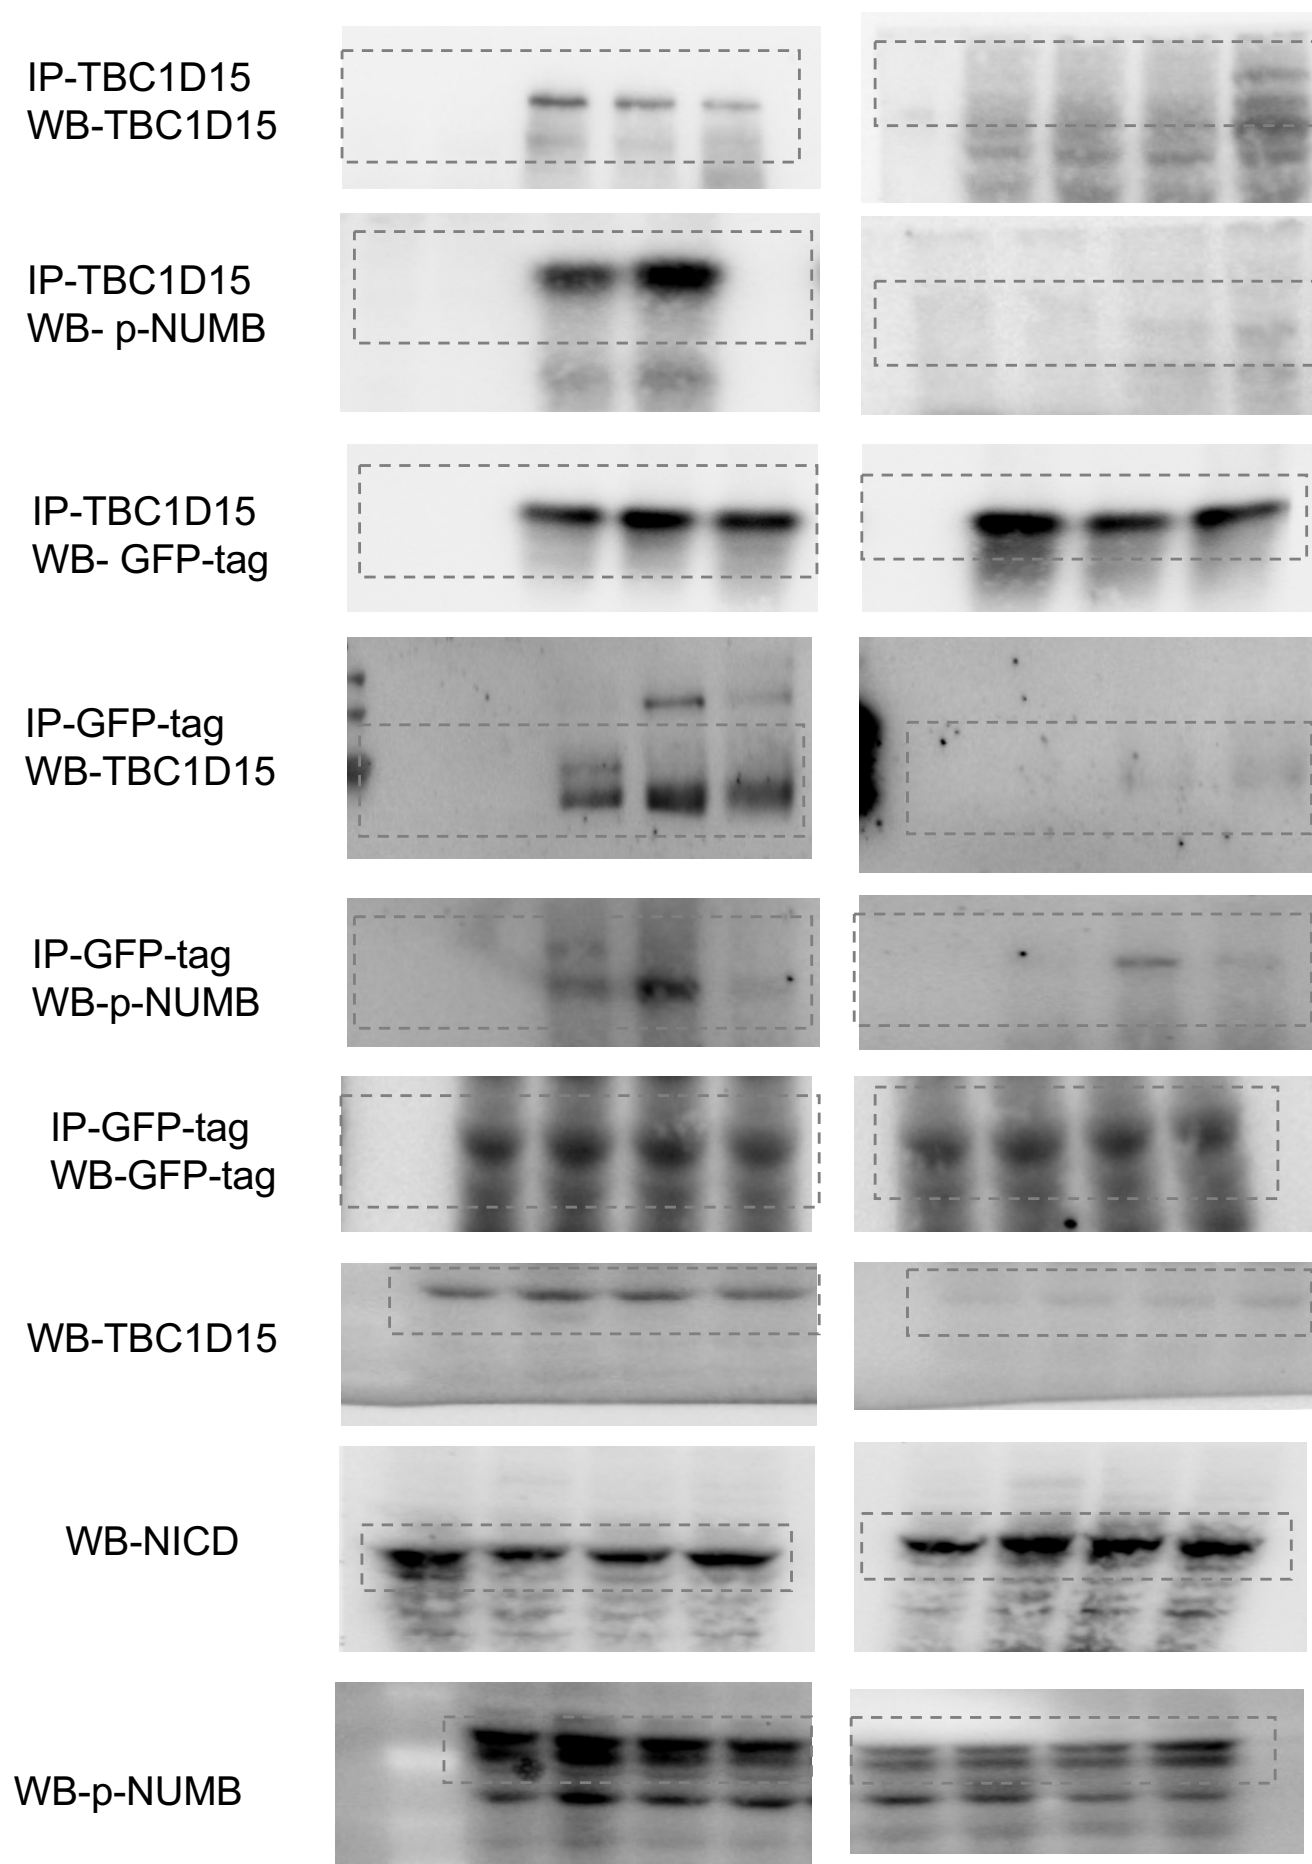

WB-NUMB

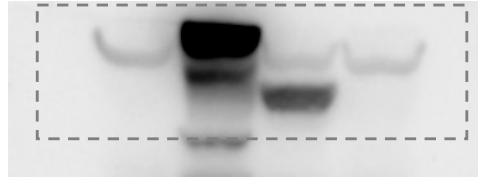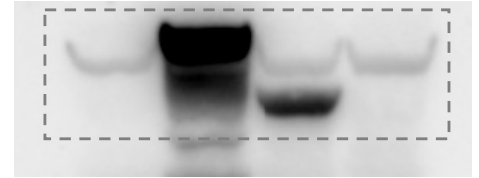

WB-GFP-tag

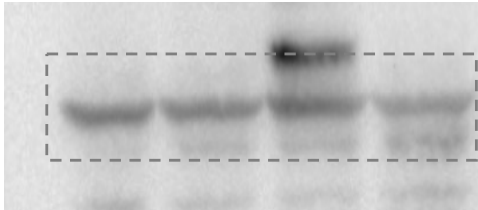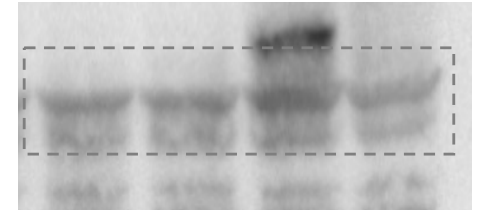

WB-ACTIN

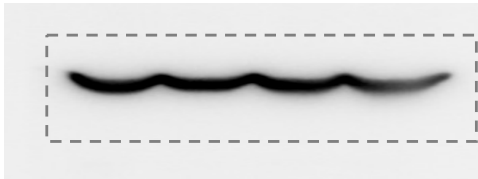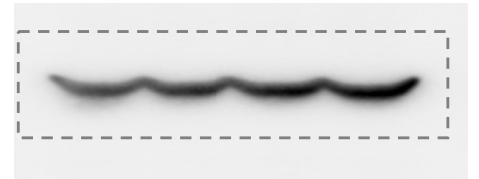

**Figure 2d**

IP-Myc-tag  
WB-TBC1D15

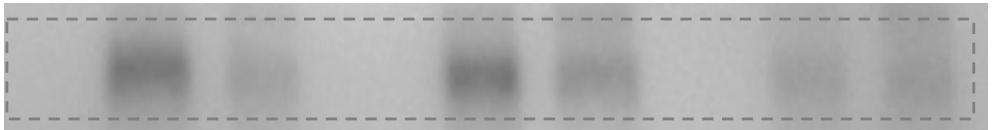

IP-Myc-tag  
WB-p-NUMB

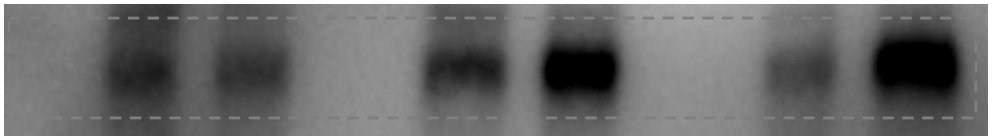

IP-Myc-tag  
WB-NUMB

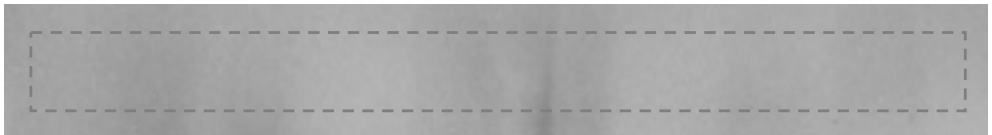

WB-p-NUMB

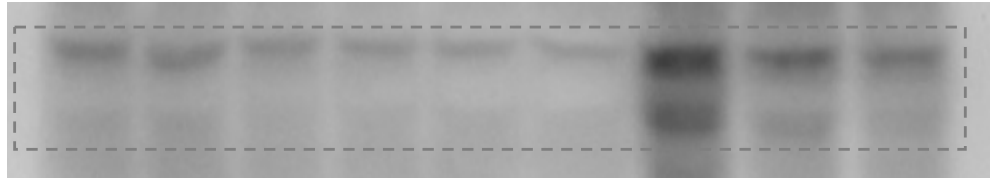

WB-NUMB

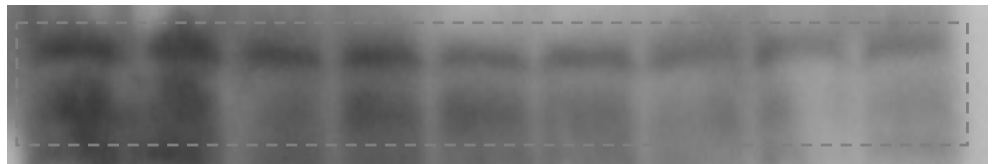

WB-TBC1D15

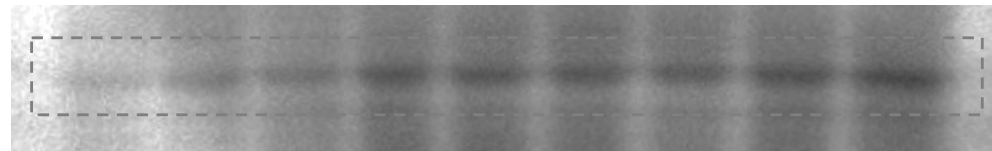

**Figure 4e**

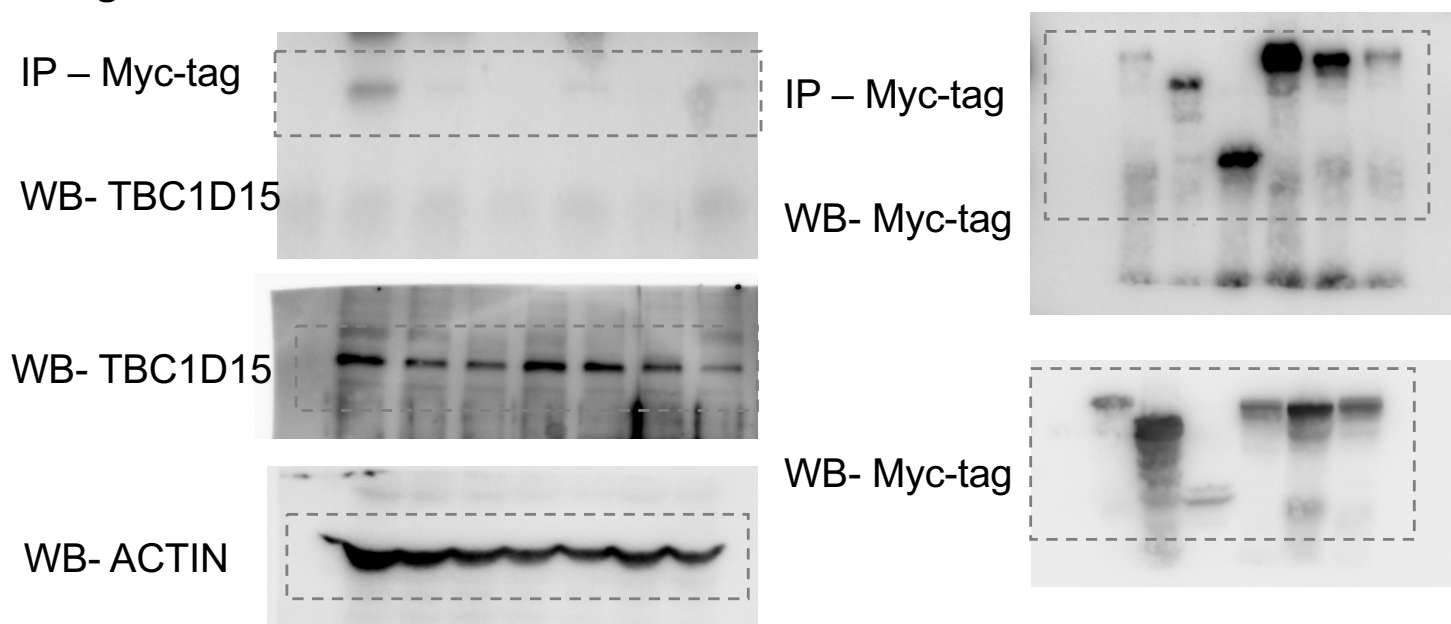

**Figure 4f**

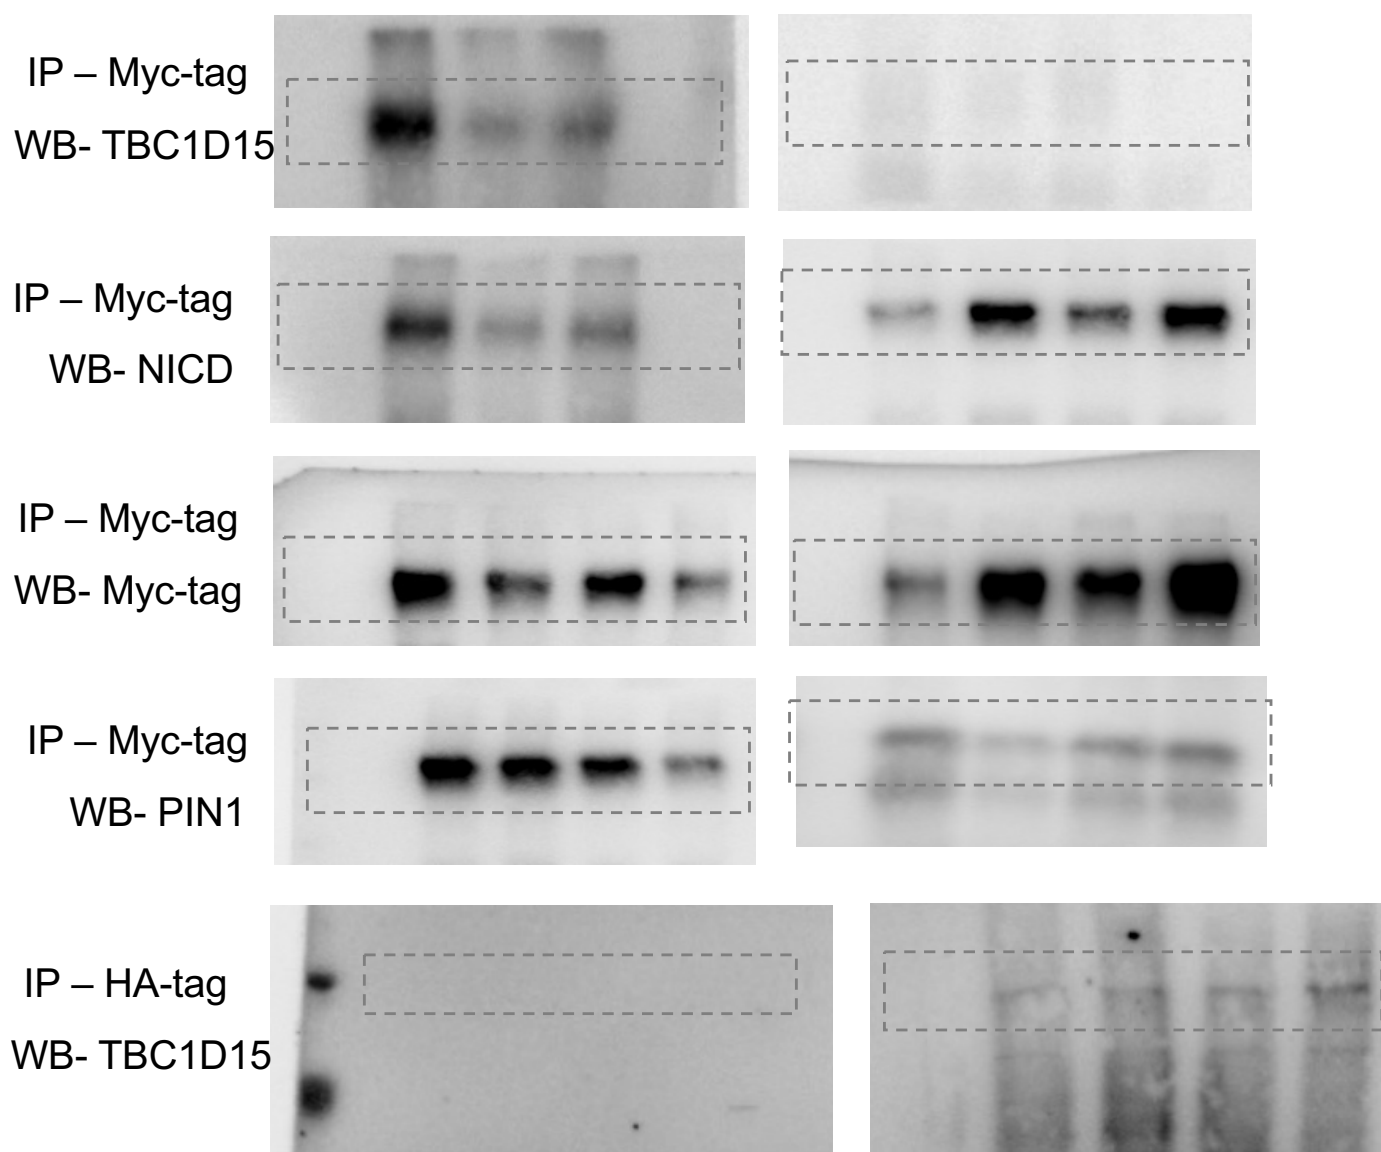

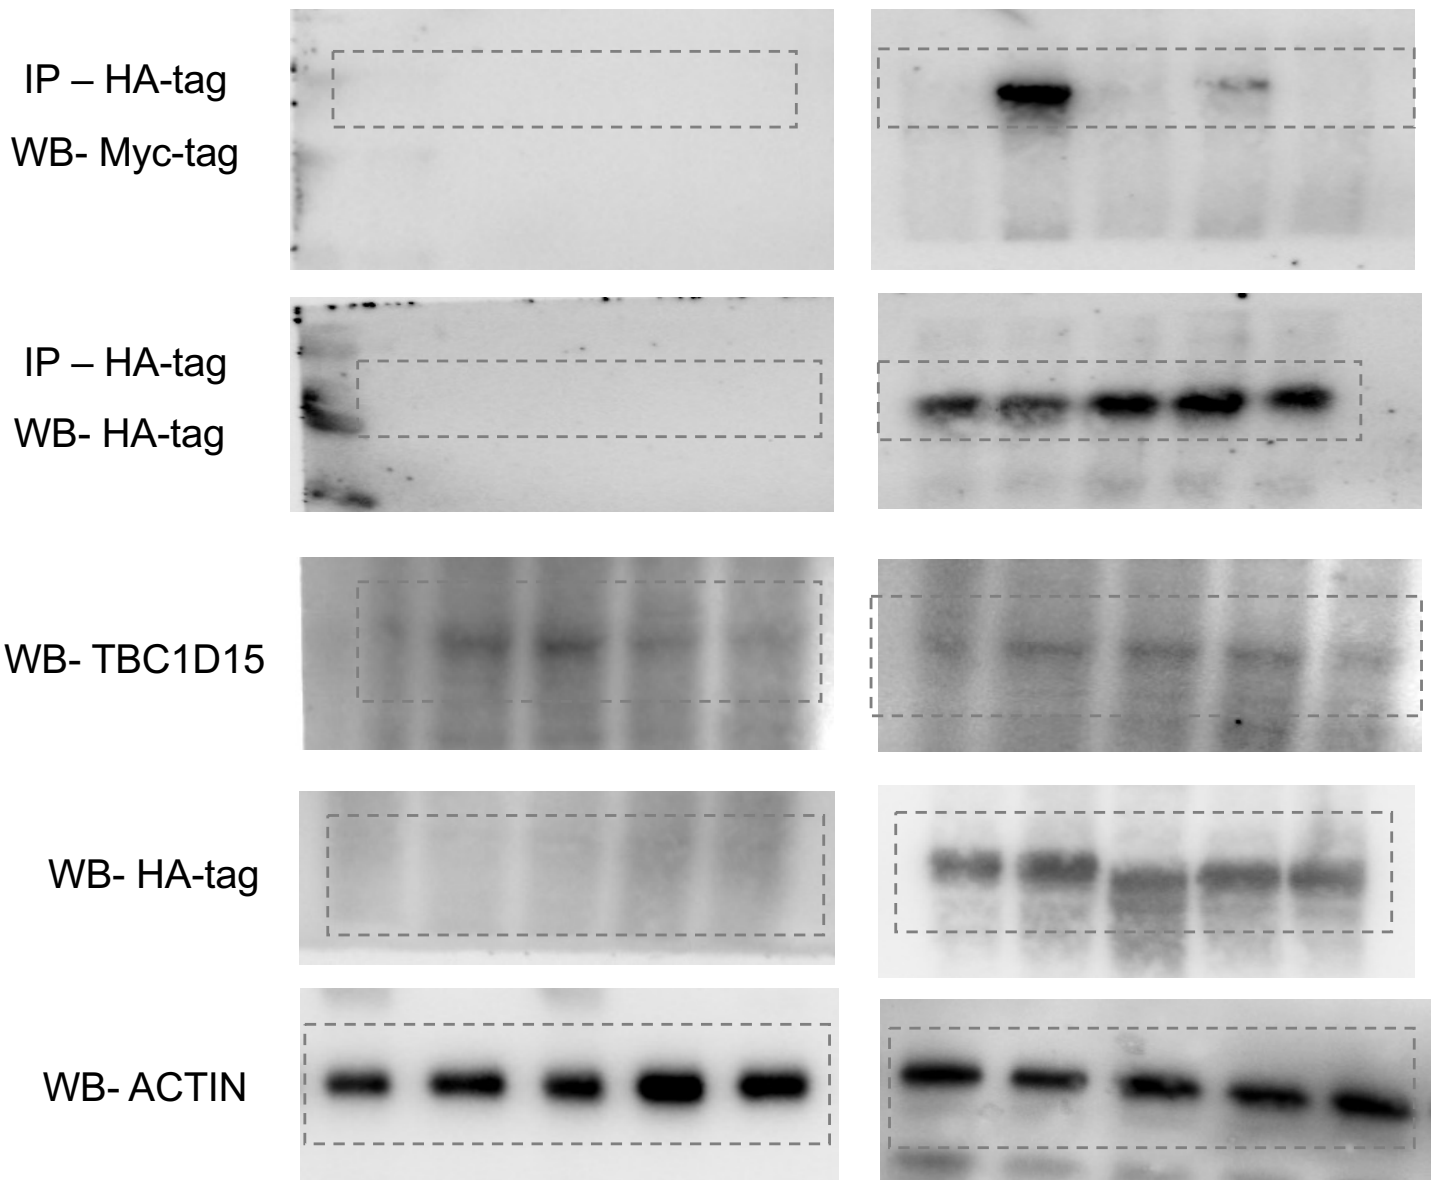

**Figure 4g**

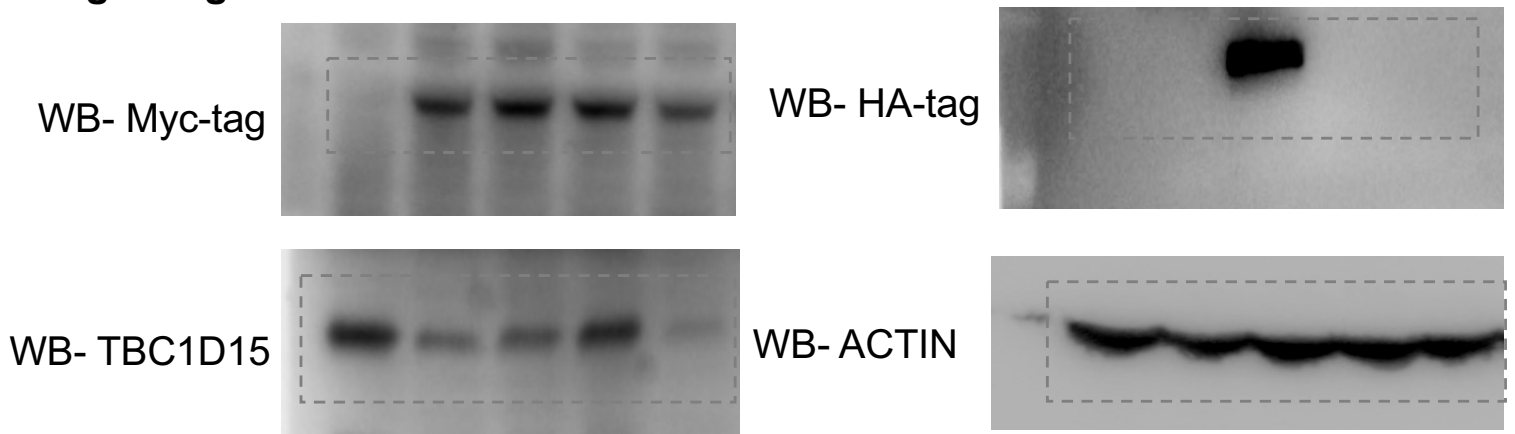

**Figure 4b**

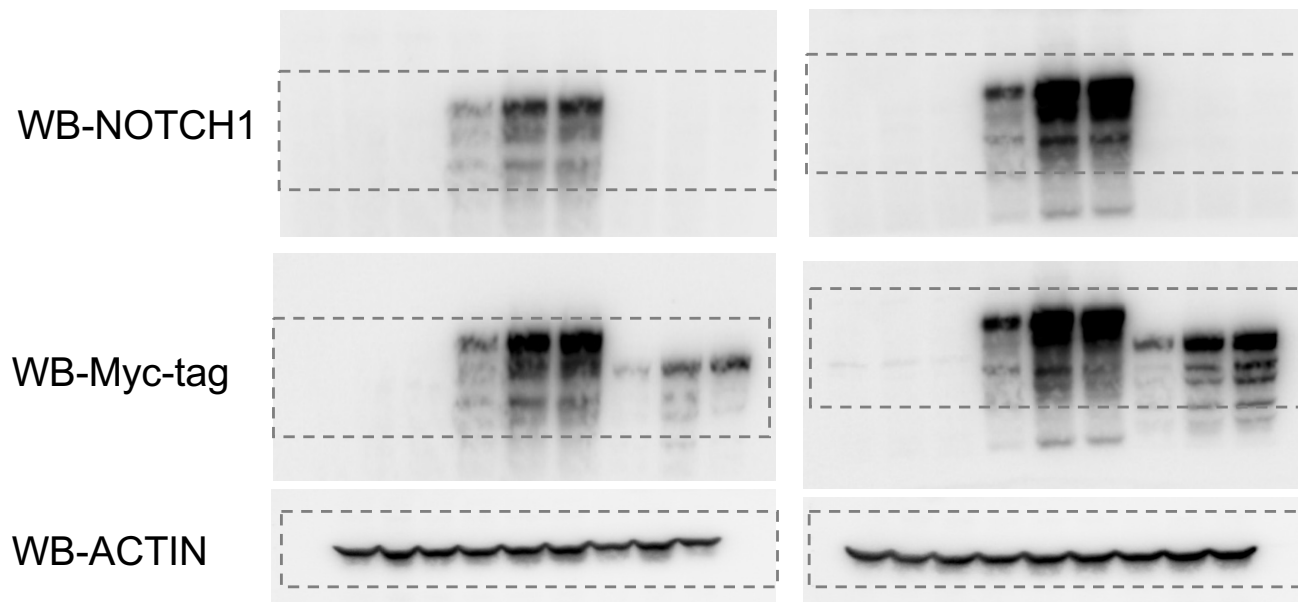

**Figure 4c**

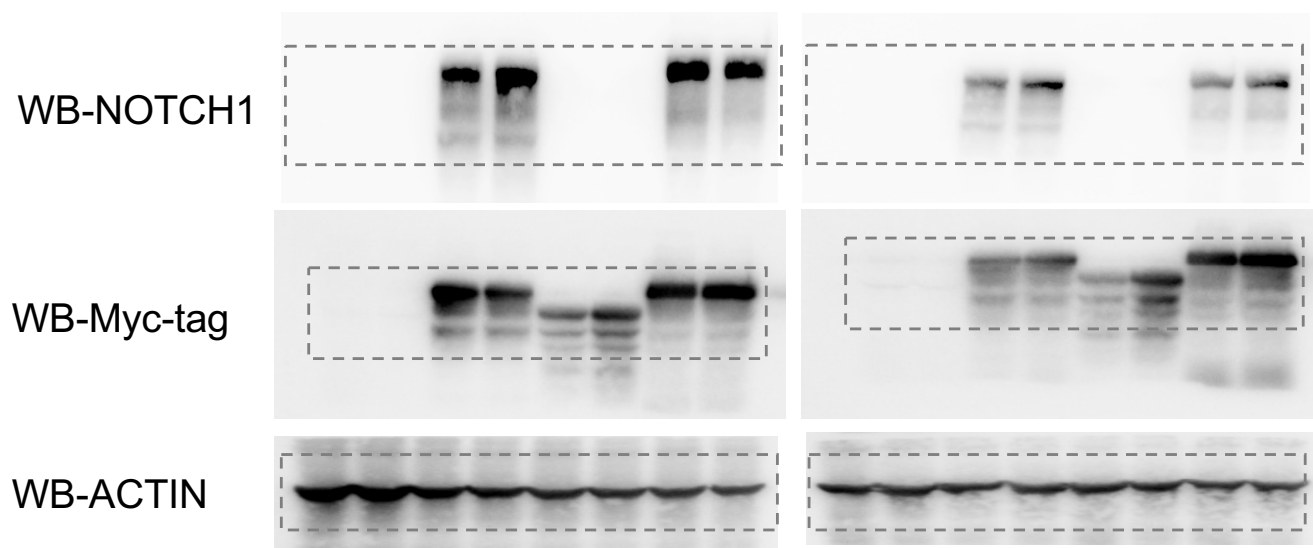

**Figure 5a**

IP-Myc-tag  
WB-TBC1D15

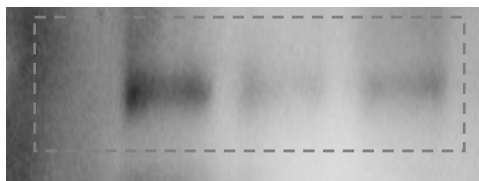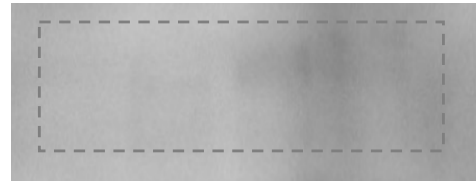

IP-Myc-tag  
WB-CDK8

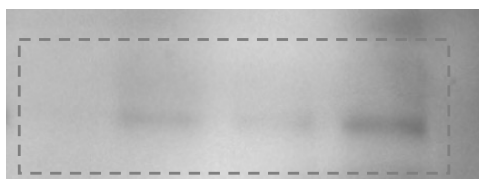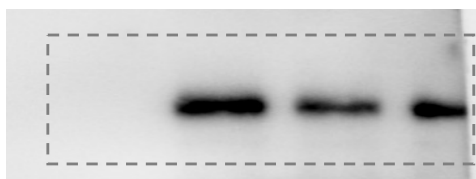

IP-Myc-tag  
WB-CDK19

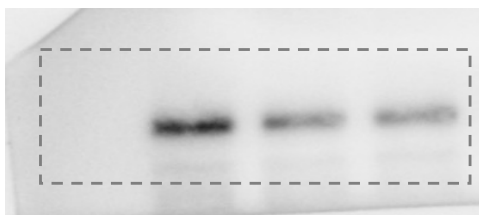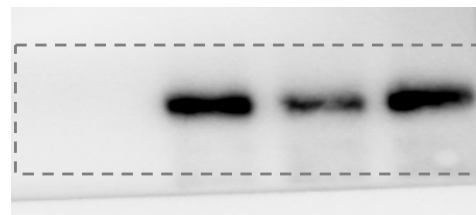

IP-CDK8  
WB-CDK8

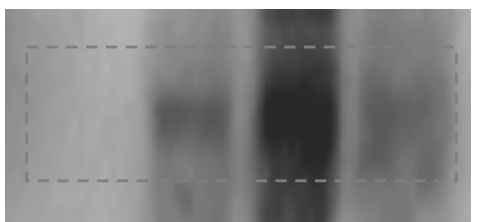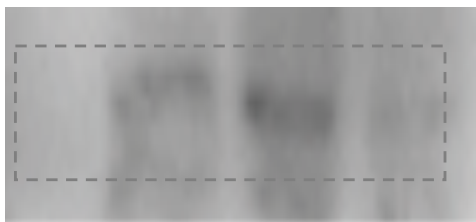

IP-CDK8  
WB-TBC1D15

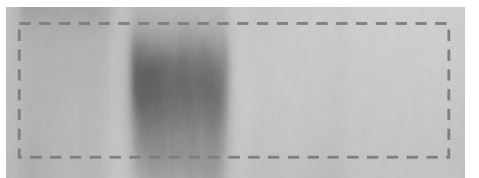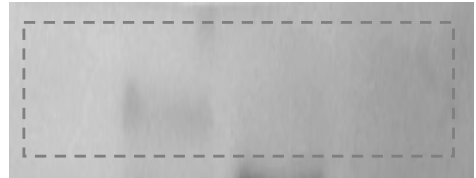

IP-CDK8  
WB-CDK19

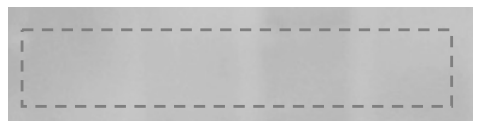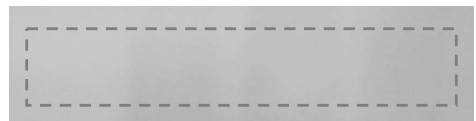

WB-TBC1D15

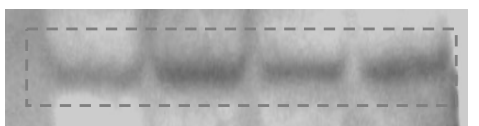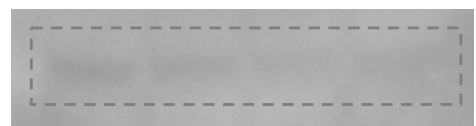

WB-CDK8

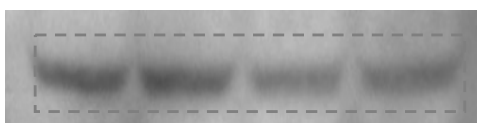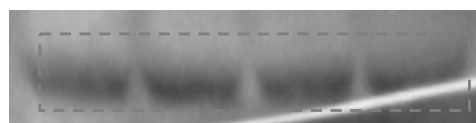

WB-CDK19

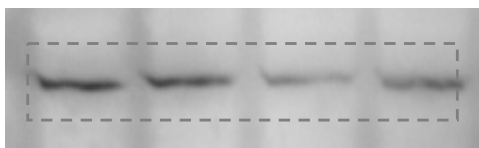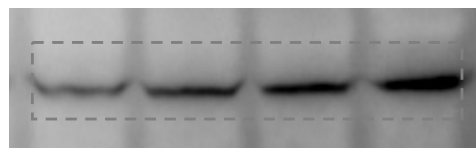

WB-ACTIN

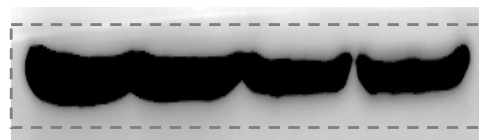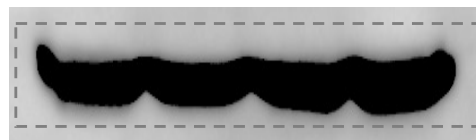



**Figure 5b**

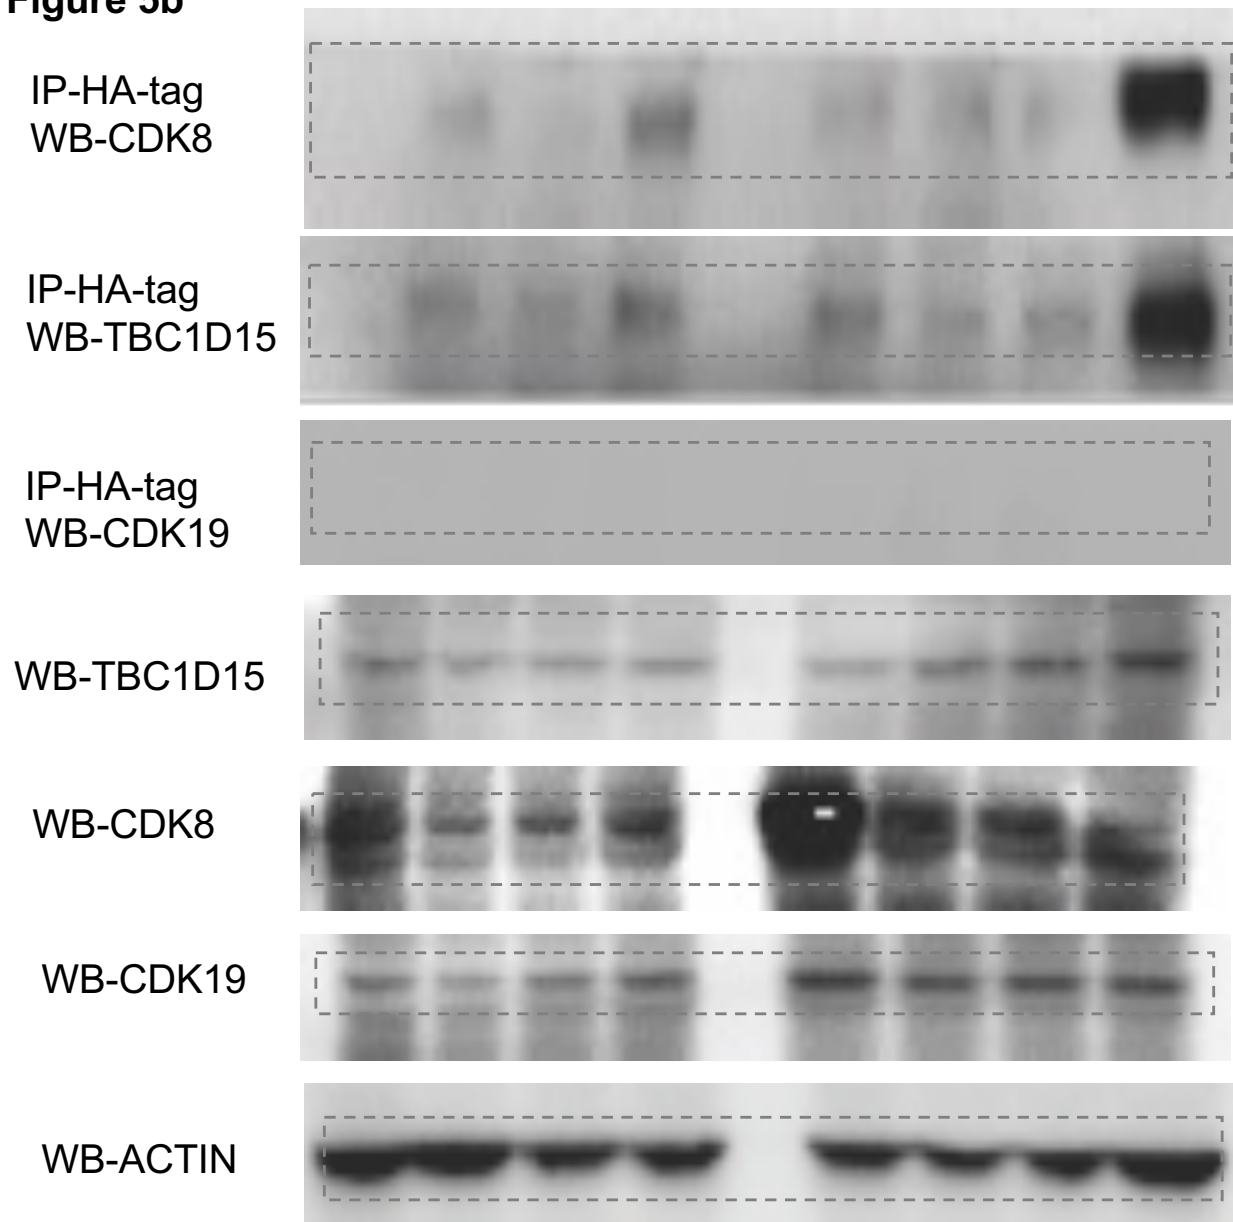

**Figure 5c**

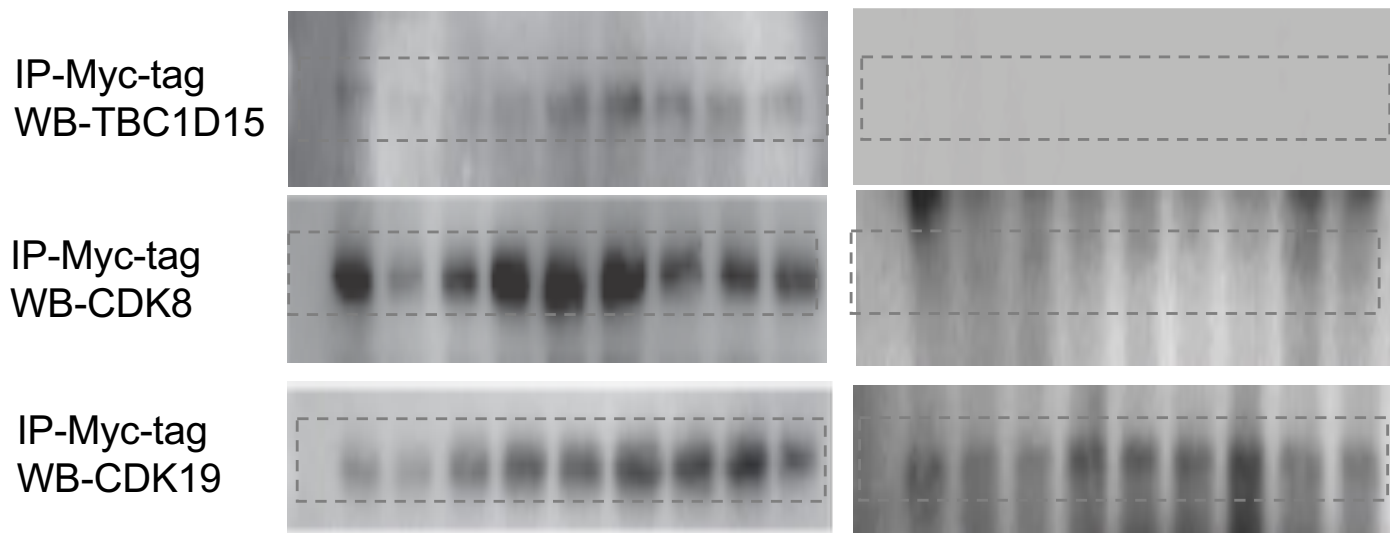

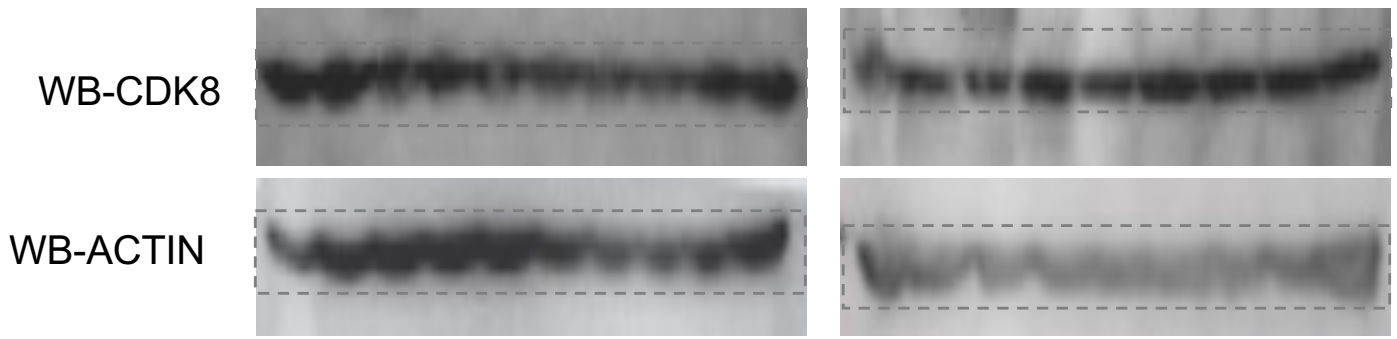

**Figure 5d**

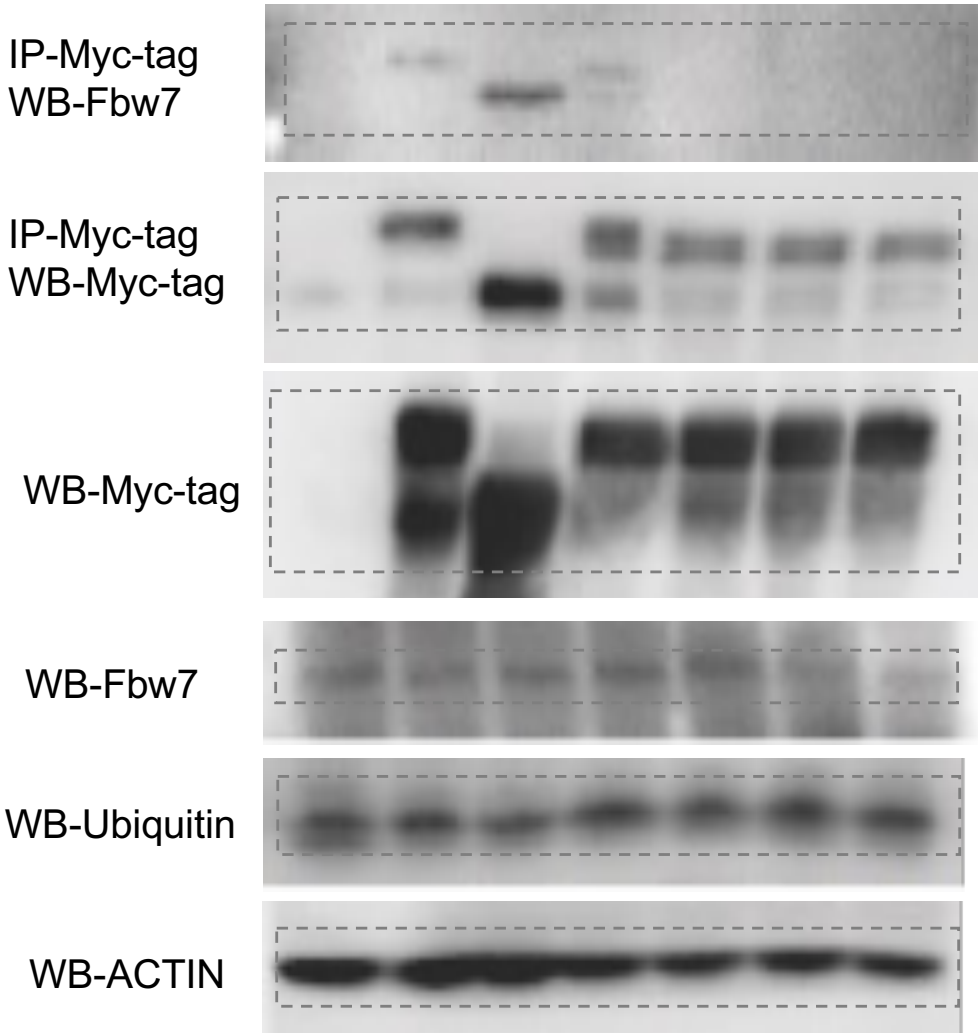

**Figure 5e**

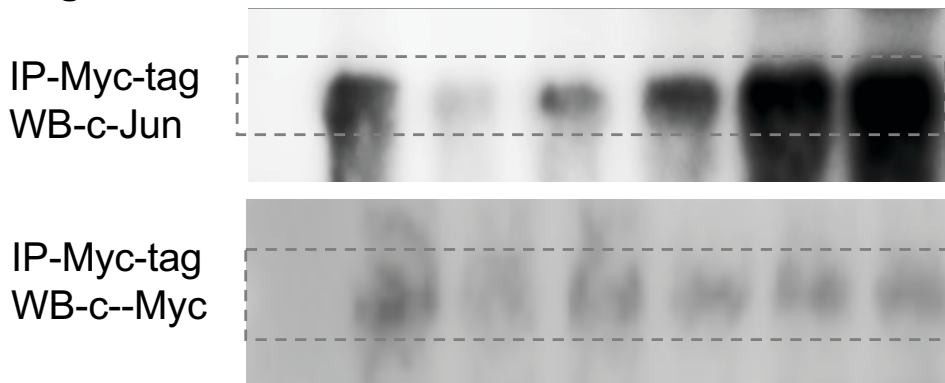

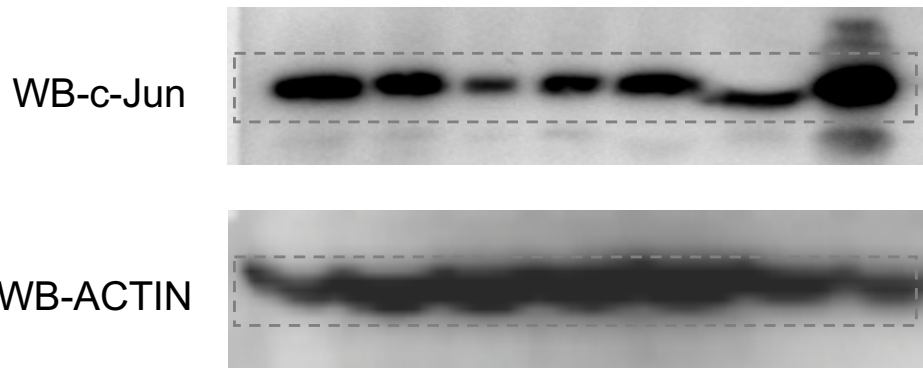

**Figure 5f**

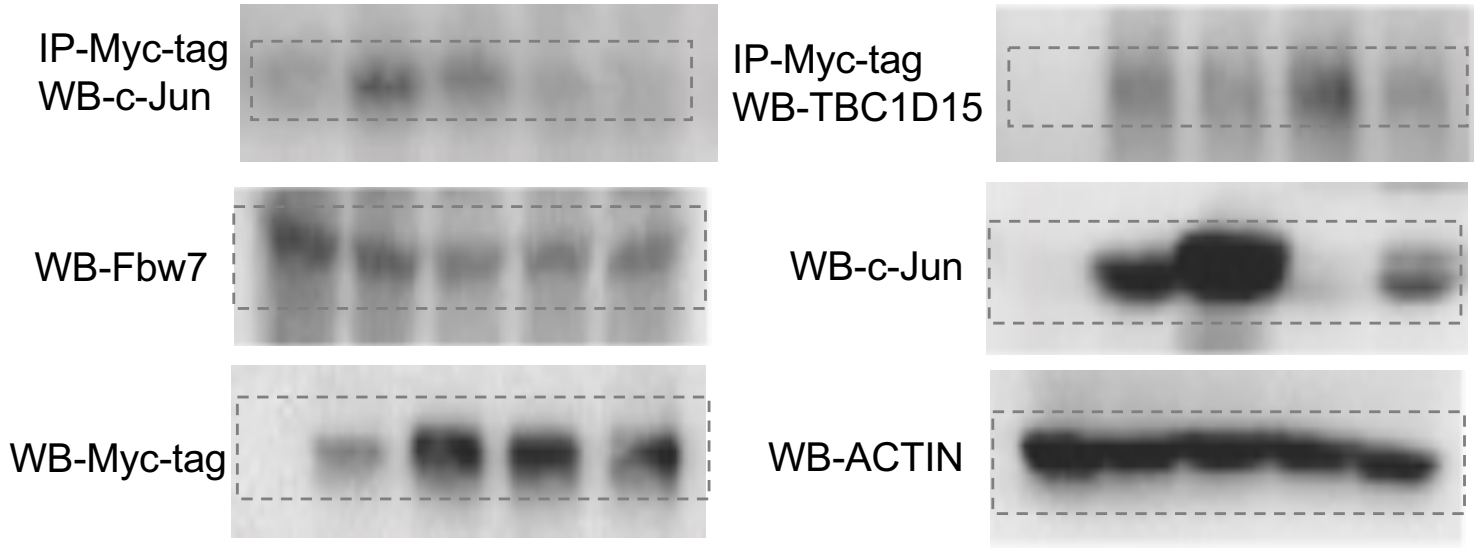

**Figure 5h**

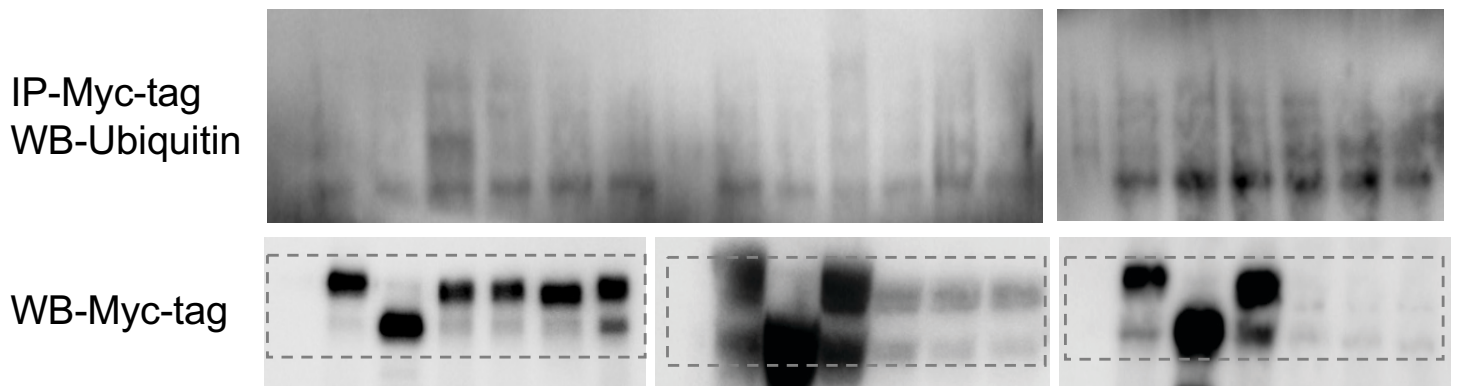

**Figure 6c**

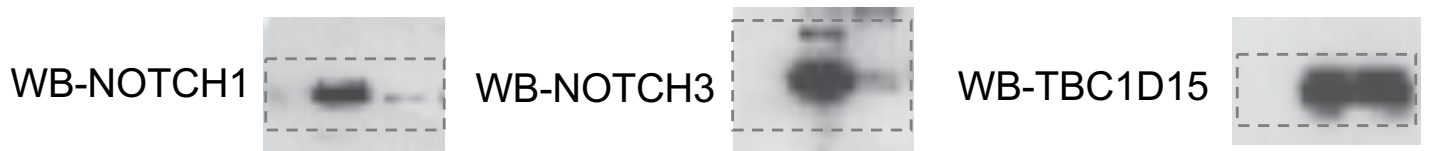

**Figure 6l**

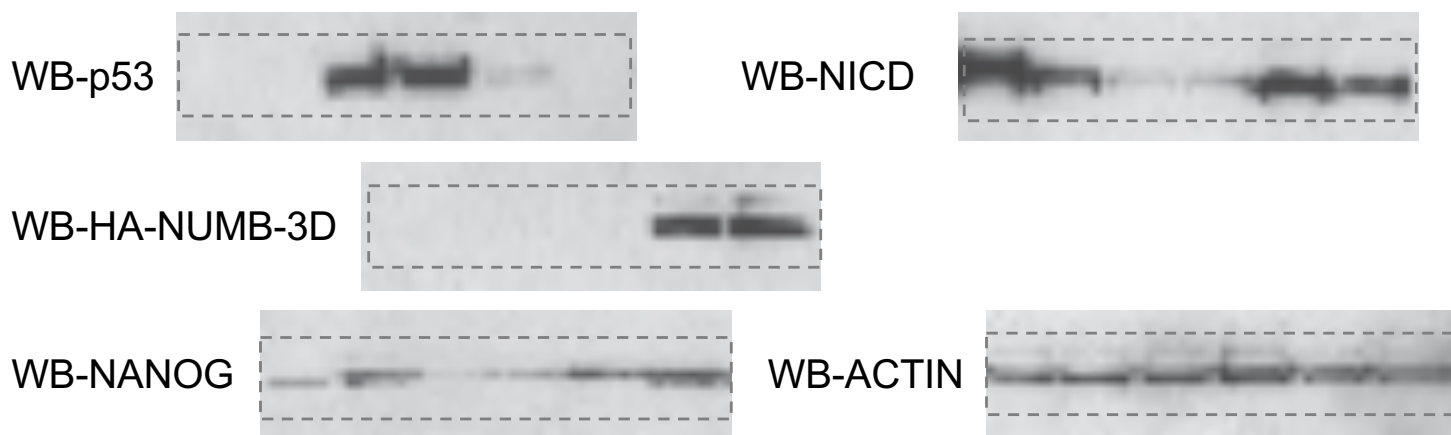

**Figure 7a**

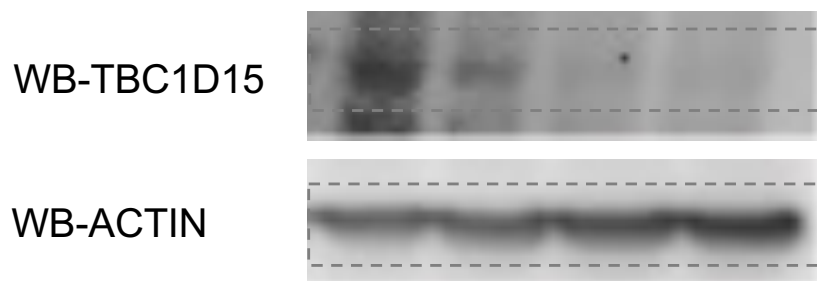

**Figure 7e**

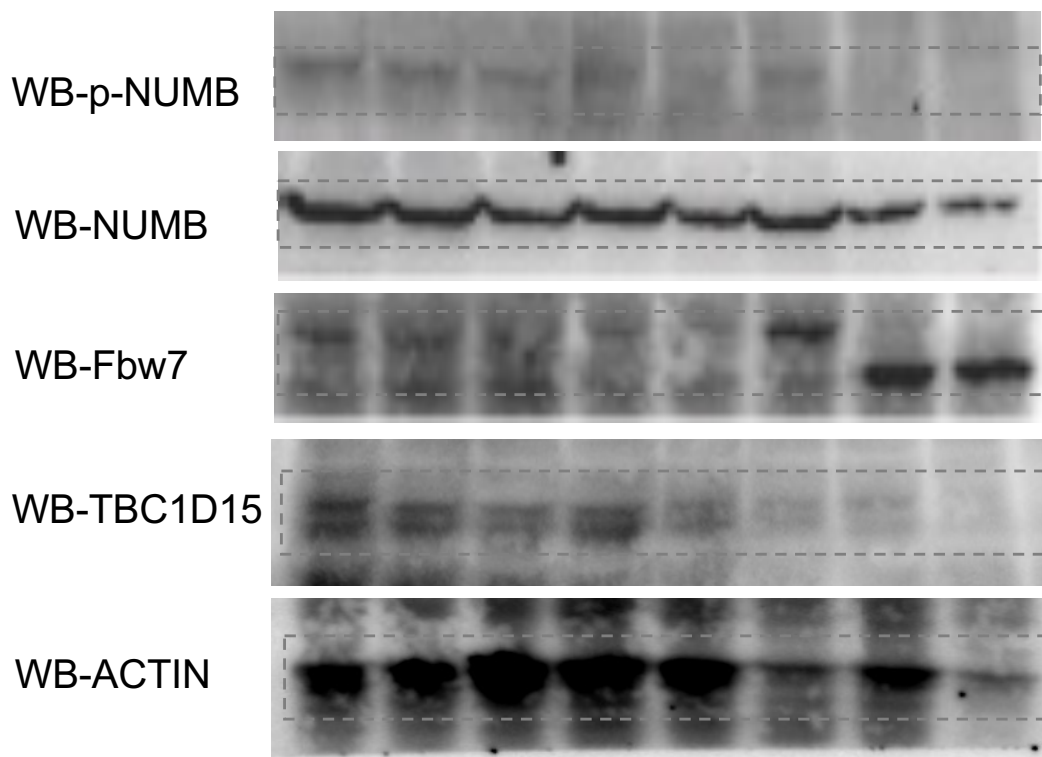

**Extended Data Figure 2d**

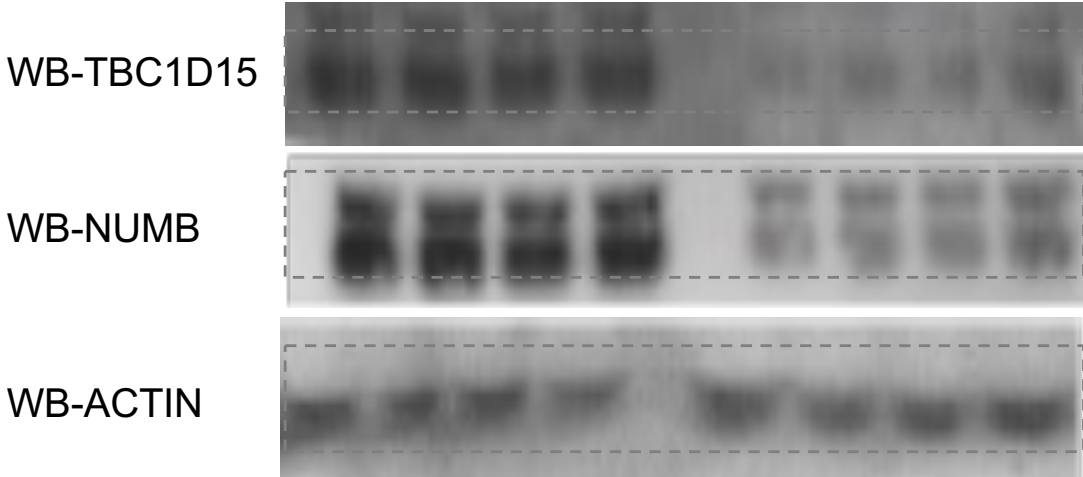

**Extended Data Figure 4b**

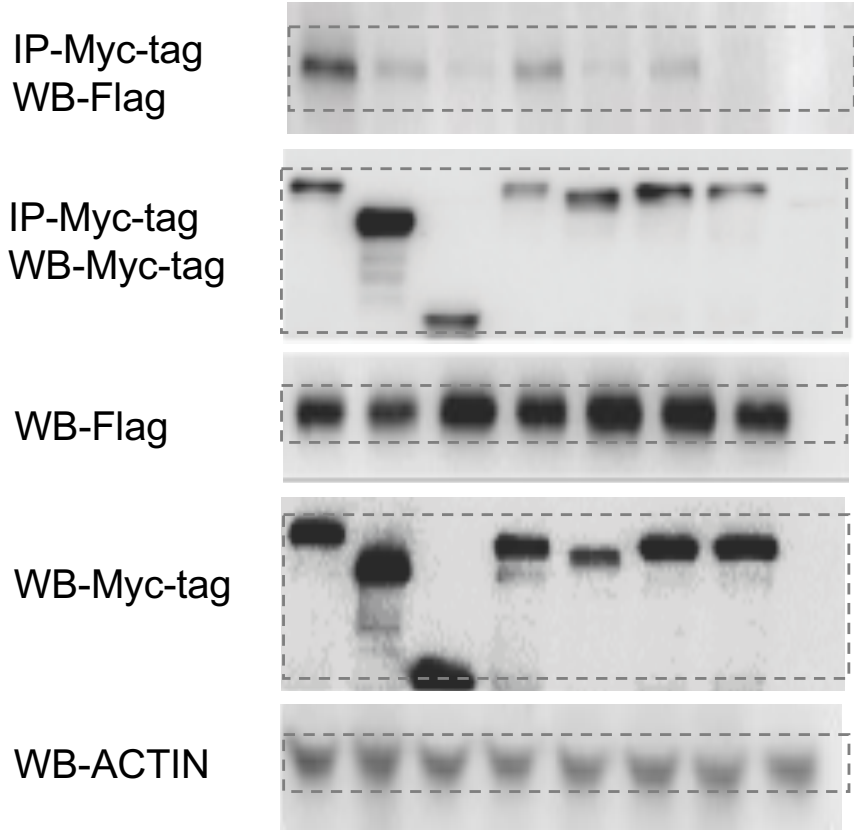

**Extended Data Figure 4c**

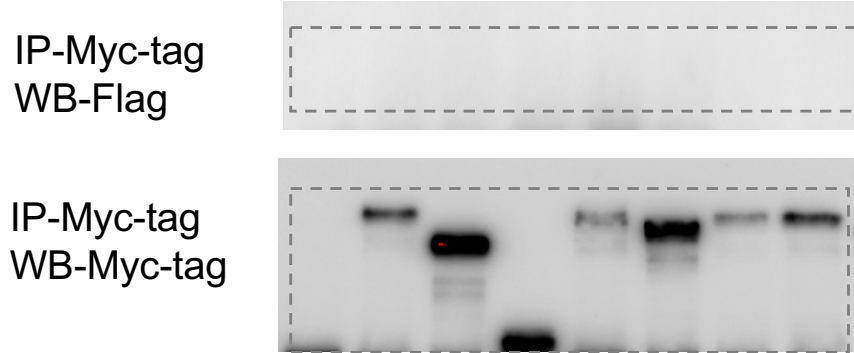

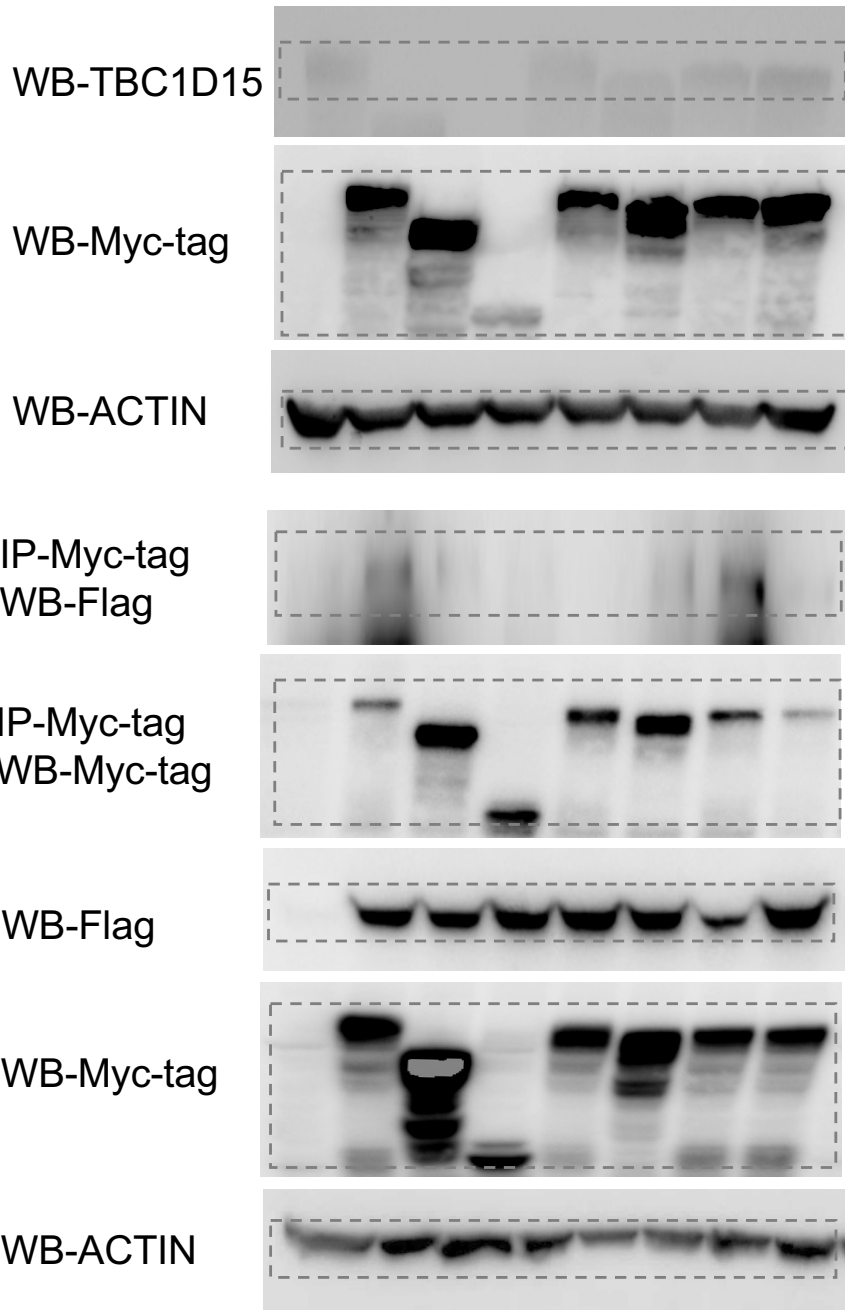

**Extended Data Figure 4d**

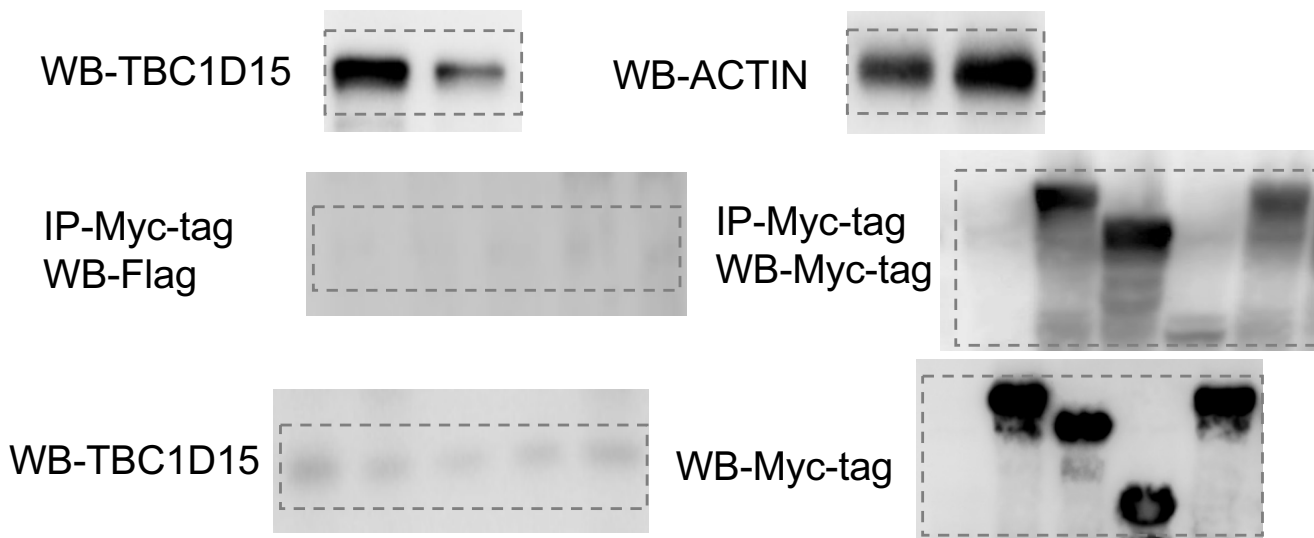

WB-ACTIN

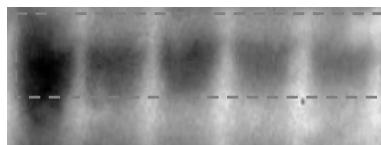

IP-Myc-tag  
WB-TBC1D15

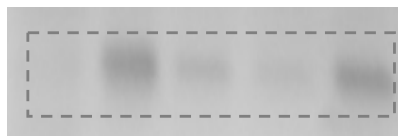

IP-Myc-tag  
WB-Myc-tag

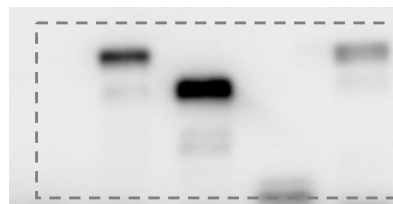

WB-TBC1D15

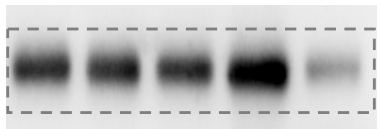

WB-Myc-tag

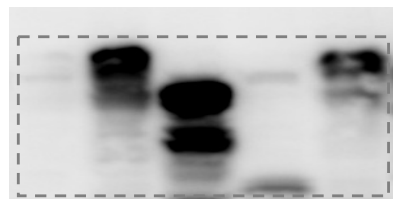

WB-ACTIN

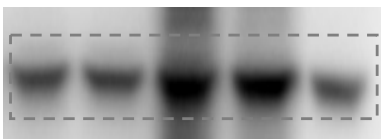

Supplement: MOESM2 [file 12276_2024_1174_MOESM2_ESM.pdf]
