# Supplementary material for: NOTCH localizes to mitochondria through the TBC1D15-FIS1 interaction and is stabilized via blockade of E3 ligase and CDK8 recruitment to reprogram tumor-initiating cells
Source: Springer Nature journal article supplement (doi:10.1038/s12276-024-01174-6), 2024-02-27
Supplement: MOESM1 [file 12276_2024_1174_MOESM1_ESM.pdf]

## **Supplementary Information**

**(Supplementary Table 1-4, Supplementary Fig. 1-6, and Suppl. Materials)**

- **Supplementary Table 1. Clinicopathological features of patients with hepatocellular carcinoma**
- **Supplementary Table 2. List of cellular components by gene ontology analysis in ChIP-qPCR with anti-NOTCH1 in CD133-positive vs. negative TICs.**
- **Supplementary Table 3. List of cellular components by gene ontology analysis in ChIP-qPCR with anti-NOTCH1 in CD133-positive TICs with/without TBC1D15 KD vs. WT.**
- **Supplementary Table 4. List of enriched anti-NOTCH1/NANOG ChIP-seq-based mitochondrial related genes in CD133-positive TICs with TBC1D15 KD vs WT.**
  
- **Supplementary Figure 1. RT-qPCR and Western blot analysis of NOTCH1/2 target genes that were identified from ChIP-seq analyses in CD133-positive TICs of TBC1D15 KO vs. WT.**
- **Supplementary Figure 2. The CD133/CD49f TICs isolated in Lung cancer cell lines.**
- **Supplementary Figure 3. The NICD C-terminal PEST domain interacts with TBC1D15 in CD133-positive TICs.**
- **Supplementary Figure 4. TBC1D15 affects NOTCH1 processing.**
- **Supplementary Figure 5. Semi-qPCR analysis of NUMB isoforms expression in TICs and non-TICs**
- **Supplementary Figure 6. TBC1D15 and NUMB isoforms are localized in CD133-negative TICs.**
  
- **Supplementary materials and methods**

**Supplementary Table 1. Clinicopathological Features of patients with Hepatocellular Carcinoma**

| <b>Feature</b>           | <b>Value</b>            |
|--------------------------|-------------------------|
| <b>Age (years)</b>       | 53 ± 9.1* (22-71)       |
| <b>Gender</b>            |                         |
| Male                     | 57                      |
| Female                   | 23                      |
| <b>Total Cholesterol</b> | 157 ± 0.66* (42-431)    |
| <b>AST</b>               | 2176 ± 1.98* (25-11945) |
| <b>ALT</b>               | 862 ± 0.78* (58-3908)   |
| <b>Primary Diagnosis</b> |                         |
| Liver Malignancy         | 5                       |
| HCV                      | 14                      |
| Alcoholism               | 19                      |
| Obesity                  | 11                      |
| NASH                     | 9                       |
| HBV                      | 14                      |
| Alcoholic HCV            | 8                       |

\* Value = Mean ± SEM

**Supplementary Table 2. List of cellular components by gene ontology analysis in ChIP-qPCR with anti-NOTCH1 in CD133-positive vs. negative TICs. Table showing the top 10 ranked by p-value.**

| Rank | Term                                                                                      | p-value  | q-value  | Genes                                                                                                                                                                                                                                                                                       |
|------|-------------------------------------------------------------------------------------------|----------|----------|---------------------------------------------------------------------------------------------------------------------------------------------------------------------------------------------------------------------------------------------------------------------------------------------|
| 1    | Focal adhesion (GO:0005925)                                                               | 0.000143 | 0.035426 | [GRB7, ACTR2, MME, LRP1, GDI2, LMO7, SORBS3, RND3, CORO1B, ADD1, DCAF6, RPL7, ACTG1, HSP90B1, CSRP2, YWHAQ, PALLD, DLC1, GNA12, PIP5K1A, RPL27, RPL18, LIMS1]                                                                                                                               |
| 2    | Mitochondrial proton-transporting ATP synthase complex (GO:0005753)                       | 0.000216 | 0.035426 | [ATP5B, ATP5D, ATP5C1, ATP5J, ATP5G2]                                                                                                                                                                                                                                                       |
| 3    | Mitochondrial proton-transporting ATP synthase complex, catalytic core F(1) (GO:0000275)  | 0.000216 | 0.035426 | [ATP5B, ATP5D, ATP5C1, ATP5J, ATP5G2]                                                                                                                                                                                                                                                       |
| 4    | Mitochondrial proton-transporting ATP synthase complex, coupling factor F(o) (GO:0000276) | 0.000274 | 0.035426 | [ATP5B, ATP5D, ATP5C1, ATP5J, ATP5G2]                                                                                                                                                                                                                                                       |
| 5    | Subsarcolemmal mitochondrion (GO:1990843)                                                 | 0.001607 | 0.092517 | [MRS2, MTCH2, NAXE, ECI2, ATP5C1, ATP5J, ETFA, ABCB8, PTS, MRPL41, ATP5B, NADK2, MPC1, FAM162A, ATP5D, MPV17, HARS, SLC25A20, JARID2, COX10, NKTR, POLG, CASP8AP2, FIS1, STARD5, MDH1, GK, OXSM, GOT2, MRPS18B, DARS2, TRNT1, SIRT3, PNKD, UQCRQ, NDUFS5, PCCB, OGDH, NDUFS2, SUCLG1, MXD1] |
| 6    | Interfibrillar mitochondrion (GO:1990844)                                                 | 0.001607 | 0.092517 | [MRS2, MTCH2, NAXE, ECI2, ATP5C1, ATP5J, ETFA, ABCB8, PTS, MRPL41, ATP5B, NADK2, MPC1, FAM162A, ATP5D, MPV17, HARS, SLC25A20, JARID2, COX10, NKTR, POLG, CASP8AP2, FIS1, STARD5, MDH1, GK, OXSM, GOT2, MRPS18B, DARS2, TRNT1, SIRT3, PNKD, UQCRQ, NDUFS5, PCCB, OGDH, NDUFS2, SUCLG1, MXD1] |
| 7    | Mitochondrion (GO:0005739)                                                                | 0.001607 | 0.092517 | [MRS2, MTCH2, NAXE, ECI2, ATP5C1, ATP5J, ETFA, ABCB8, PTS, MRPL41, ATP5B, NADK2, MPC1, FAM162A, ATP5D, MPV17, HARS, SLC25A20, JARID2, COX10, NKTR, POLG, CASP8AP2, FIS1, STARD5, MDH1, GK, OXSM, GOT2, MRPS18B, DARS2, TRNT1, SIRT3, PNKD, UQCRQ, NDUFS5, PCCB, OGDH, NDUFS2, SUCLG1, MXD1] |
| 8    | Nebenkern (GO:0016006)                                                                    | 0.001607 | 0.092517 | [MRS2, MTCH2, NAXE, ECI2, ATP5C1, ATP5J, ETFA, ABCB8, PTS, MRPL41, ATP5B, NADK2, MPC1, FAM162A, ATP5D, MPV17, HARS, SLC25A20, JARID2, COX10, NKTR, POLG, CASP8AP2, FIS1, STARD5, MDH1, GK, OXSM, GOT2, MRPS18B, DARS2, TRNT1, SIRT3, PNKD, UQCRQ, NDUFS5, PCCB, OGDH, NDUFS2, SUCLG1, MXD1] |
| 9    | Mitochondrial derivative (GO:0016007)                                                     | 0.001607 | 0.092517 | [MRS2, MTCH2, NAXE, ECI2, ATP5C1, ATP5J, ETFA, ABCB8, PTS, MRPL41, ATP5B, NADK2, MPC1, FAM162A, ATP5D, MPV17, HARS, SLC25A20, JARID2, COX10, NKTR, POLG, CASP8AP2, FIS1, STARD5, MDH1, GK, OXSM, GOT2, MRPS18B, DARS2, TRNT1, SIRT3, PNKD, UQCRQ, NDUFS5, PCCB, OGDH, NDUFS2, SUCLG1, MXD1] |
| 10   | Cul4B-RING E3 ubiquitin ligase complex (GO:0031465)                                       | 0.001917 | 0.098918 | [CUL5, DTL, DCAF7, DCAF6]                                                                                                                                                                                                                                                                   |

**Supplementary Table 3. List of cellular components by gene ontology analysis in ChIP-qPCR with anti-NOTCH1 in CD133-positive TICs with/without TBC1D15 KD vs. WT. Table showing the top 10 ranked by p-value.**

| Rank | Term                                                      | p-value  | q-value  | overlap_genes                                       |
|------|-----------------------------------------------------------|----------|----------|-----------------------------------------------------|
| 1    | Mitochondrial matrix (GO:0005759)                         | 6.48E-09 | 1.75E-07 | [ALAS1, GOT2, ETFA, PDHB, ACADM, ME2, ACSF2, FARS2] |
| 2    | Intracellular organelle lumen (GO:0070013)                | 5.74E-06 | 7.75E-05 | [ALAS1, GOT2, ETFA, PDHB, ACADM, ME2, ACSF2, FARS2] |
| 3    | Mitochondrial membrane (GO:0031966)                       | 1.95E-05 | 1.76E-04 | [SLC25A16, MRPL1, CYCS, MRPS10, ACADM, MRPL46]      |
| 4    | Mitochondrial inner membrane (GO:0005743)                 | 4.67E-05 | 3.15E-04 | [SLC25A16, MRPL1, CYCS, MRPS10, MRPL46]             |
| 5    | Organelle inner membrane (GO:0019866)                     | 6.02E-05 | 3.25E-04 | [SLC25A16, MRPL1, CYCS, MRPS10, MRPL46]             |
| 6    | Integral component of mitochondrial membrane (GO:0032592) | 3.06E-03 | 1.38E-02 | [FIS1, MPC2]                                        |
| 7    | Mitochondrial envelope (GO:0005740)                       | 1.09E-02 | 3.74E-02 | [CYCS, ACADM]                                       |
| 8    | Peroxisome (GO:0005777)                                   | 1.11E-02 | 3.74E-02 | [FIS1, EHHADH]                                      |
| 9    | Integral component of peroxisomal membrane (GO:0005779)   | 1.61E-02 | 4.69E-02 | [FIS1]                                              |
| 10   | Intrinsic component of peroxisomal membrane (GO:0031231)  | 1.74E-02 | 4.69E-02 | [FIS1]                                              |

**Supplementary Table 4. List of enriched anti-NOTCH1/NANOG ChIP-seq-based mitochondrial relate genes in CD133-positive TICs with TBC1D15 KD vs WT.**

| Feature     | Gene    | Description transcript          | Start peak | End peak | Probe strand | Promoter | Relative enrichment | Fold depletion |
|-------------|---------|---------------------------------|------------|----------|--------------|----------|---------------------|----------------|
| Anti-NOTCH1 | TBC1D15 | KO vs WT in CD133-positive TICs |            |          |              |          |                     |                |

|                                                           |                                                                                                                             |           |           |   |     |           |           |
|-----------------------------------------------------------|-----------------------------------------------------------------------------------------------------------------------------|-----------|-----------|---|-----|-----------|-----------|
| Atp5b                                                     | ATP synthase, H+ transporting mitochondrial F1 complex, beta subunit [Source:MGI Symbol;Acc:MGI:107801]                     | 128086681 | 128088681 | + |     | 2.445995  | 3.9267337 |
| Fis1                                                      | fission, mitochondrial 1 [Source:MGI Symbol;Acc:MGI:1913687]                                                                | 136961845 | 136963845 | + |     | 2.3033295 | 4.2162404 |
| Slc25a16                                                  | solute carrier family 25 (mitochondrial carrier, Graves disease autoantigen), member 16 [Source:MGI Symbol;Acc:MGI:1920382] | 62946026  | 62948026  | + | Yes | 2.267997  | 3.7568085 |
| Fis1                                                      | fission, mitochondrial 1 [Source:MGI Symbol;Acc:MGI:1913687]                                                                | 136961433 | 136963433 | + |     | 2.2374082 | 4.457248  |
| Mrps10                                                    | mitochondrial ribosomal protein S10 [Source:MGI Symbol;Acc:MGI:1928139]                                                     | 47367891  | 47369891  | + | Yes | 2.1304934 | 3.7568085 |
| Slc25a16                                                  | solute carrier family 25 (mitochondrial carrier, Graves disease autoantigen), member 16 [Source:MGI Symbol;Acc:MGI:1920382] | 62946075  | 62948075  | + | Yes | 2.0980718 | 3.9267337 |
| Fis1                                                      | fission, mitochondrial 1 [Source:MGI Symbol;Acc:MGI:1913687]                                                                | 136961077 | 136963077 | + |     | 1.8960276 | 4.7568088 |
| Got2                                                      | glutamatic-oxaloacetic transaminase 2, mitochondrial [Source:MGI Symbol;Acc:MGI:95792]                                      | 95867045  | 95869045  | - |     | 1.8865674 | 3.9267337 |
| Mrpl46                                                    | mitochondrial ribosomal protein L46 [Source:MGI Symbol;Acc:MGI:1914558]                                                     | 78777366  | 78779366  | - |     | 1.8789549 | 4.078737  |
| Mpc2                                                      | mitochondrial pyruvate carrier 2 [Source:MGI Symbol;Acc:MGI:1917706]                                                        | 165466500 | 165468500 | + |     | 1.8085651 | 3.3417711 |
| Me2                                                       | malic enzyme 2, NAD(+)-dependent, mitochondrial [Source:MGI Symbol;Acc:MGI:2147351]                                         | 73814392  | 73816392  | - | Yes | 1.8085651 | 4.7568088 |
| Mrps10                                                    | mitochondrial ribosomal protein S10 [Source:MGI Symbol;Acc:MGI:1928139]                                                     | 47368197  | 47370197  | + | Yes | 1.8085651 | 4.078737  |
| Mrpl1                                                     | mitochondrial ribosomal protein L1 [Source:MGI Symbol;Acc:MGI:2137202]                                                      | 96208493  | 96210493  | + |     | 1.7560978 | 4.5641637 |
| Minos1                                                    | mitochondrial inner membrane organizing system 1 [Source:MGI Symbol;Acc:MGI:1913628]                                        | 139130113 | 139132113 | - | Yes | 1.7471647 | 4.341771  |
| Fars2                                                     | phenylalanine-tRNA synthetase 2 (mitochondrial) [Source:MGI Symbol;Acc:MGI:1917205]                                         | 36458280  | 36460280  | - |     | 1.7345643 | 4.078737  |
| Atp5b                                                     | ATP synthase, H+ transporting mitochondrial F1 complex, beta subunit [Source:MGI Symbol;Acc:MGI:107801]                     | 128087552 | 128089552 | + |     | 1.7016501 | 4.5641637 |
| <b>Anti-NANOG TBC1D15 KO vs WT in CD133-positive TICs</b> |                                                                                                                             |           |           |   |     |           |           |
| Atp6v1c2                                                  | ATPase, H+ transporting, lysosomal V1 subunit C2                                                                            | 17323665  | 17325665  | - | Yes | 3.2333727 | 5.286448  |
| Atp6v1c2                                                  | ATPase, H+ transporting, lysosomal V1 subunit C2                                                                            | 17323703  | 17325703  | - | Yes | 3.1860666 | 5.239142  |
| Atp8b4                                                    | ATPase, class I, type 8B, member 4                                                                                          | 126490573 | 126492573 | - |     | 1.9345276 | 5.139606  |
| Atp8b2                                                    | ATPase, class I, type 8B, member 2                                                                                          | 89953639  | 89955639  | - |     | 1.8276126 | 5.032691  |
| Me3                                                       | malic enzyme 3, NADP(+)-dependent, mitochondrial                                                                            | 89828282  | 89830282  | + |     | 3.2333727 | 5.286448  |
| Imp2l                                                     | IMP2 inner mitochondrial membrane peptidase- like (S. cerevisiae)                                                           | 41544391  | 41546391  | + |     | 2.985154  | 5.1902323 |
| Diablo                                                    | diablo, IAP-binding mitochondrial protein                                                                                   | 123517231 | 123519231 | + |     | 2.8820603 | 5.0871387 |
| Mecr                                                      | mitochondrial trans-2-enoyl-CoA reductase                                                                                   | 131859233 | 131861233 | + |     | 2.297098  | 5.5021763 |
| Atp5h                                                     | ATP synthase, H+ transporting, mitochondrial F0 complex, subunit D                                                          | 115416018 | 115418018 | - |     | 2.2146356 | 5.419714  |
| Mtus1                                                     | mitochondrial tumor suppressor 1                                                                                            | 41053794  | 41055794  | - |     | 1.9345276 | 5.139606  |
| Cmpk2                                                     | cytidine monophosphate (UMP-CMP) kinase 2, mitochondrial                                                                    | 26472930  | 26474930  | + |     | 1.8820603 | 5.0871387 |
| Slc25a26                                                  | solute carrier family 25 (mitochondrial carrier, phosphate carrier), member 26                                              | 94533140  | 94535140  | + |     | 1.8276126 | 5.032691  |

## Supplementary Figures

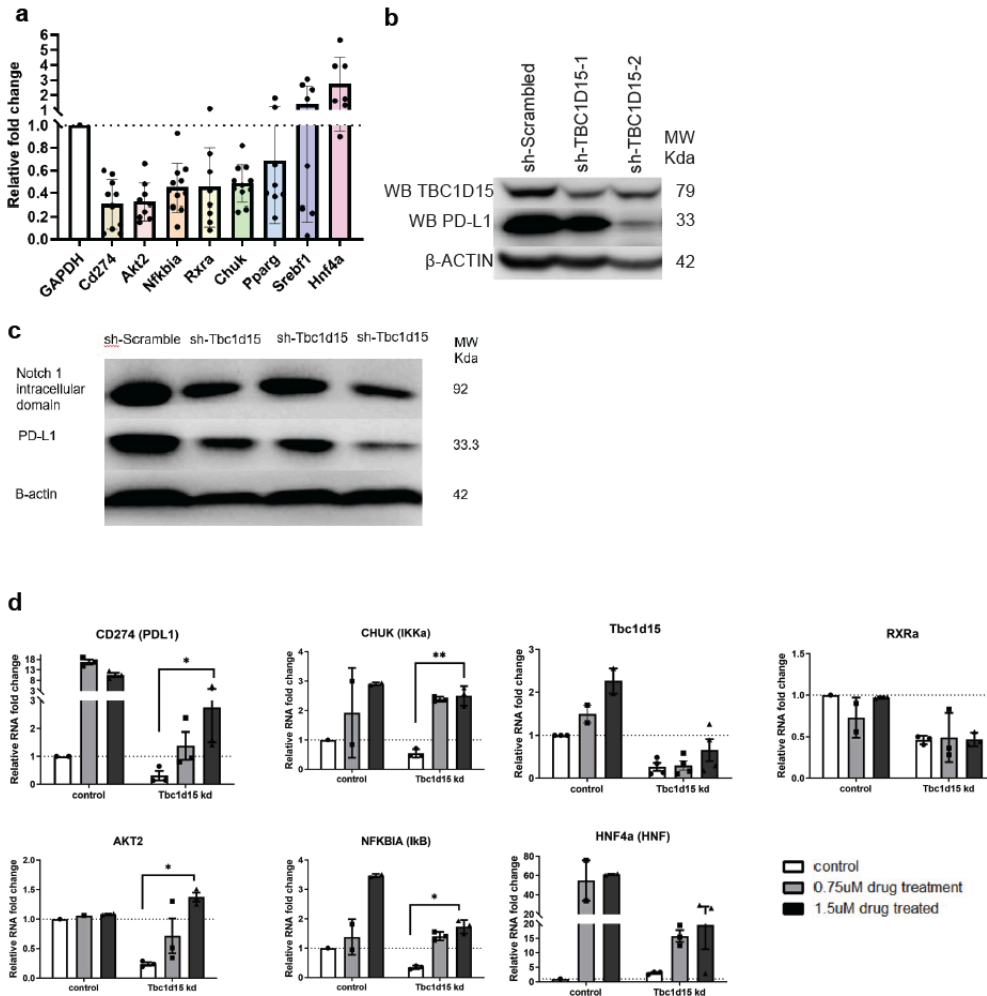

Extended Data Figure 1  
Choi *et al.*

### Supplementary Fig. 1. The mRNA and protein levels of CHIP-seq target genes were examined after TBC1D15 silencing in Huh7 cells.

(a) *TBC1D15* regulated gene. RT-qPCR analysis of *TBC1D15*-knockdown Huh7 showed PD-L1 (*CD274*), *NFKBIA* (*IκB*), *RXRA* (*RXRα*), *CHUK* (*IKKα*), and *AKT2* (*AKT*) are significantly down-regulated, while *HNF4A* (*HNF4α*) is significantly up-regulated by knocking down of *TBC1D15*. (b) Immunoblotting analysis of *TBC1D15*-knockdown Huh7 showed expression of PD-L1 protein was down-regulated by knocking down of *TBC1D15*. (c) PD-L1 expression in Notch signaling pathway reactivated Huh7 knock down cell. Western blot showed a same pattern for Notch 1 intracellular domain and PD-L1. (d) qRT-PCR result showed *TBC1D15* had no significant different by adding 0.75 μM or 1.5M of Notch pathway activator oxalipatin. (C-H) qRT-PCR result showed upregulation of *CD274*, *CHUK*, *AKT2*, and *NFKBIA* by activating Notch pathway induced by oxalipatin treatment; (G) however, *HNF4A* and *RXRA* was not affected by oxalipatin treatment.



and Paraganglioma, PRAD-Prostate adenocarcinoma, READ-Rectum adenocarcinoma, SARC-Sarcoma, SKCM-Skin Cutaneous Melanoma, STAD-Stomach adenocarcinoma, TGCT-Testicular Germ Cell Tumors, THCA-Thyroid carcinoma, THYM-Thymoma, UCEC-Uterine Corpus Endometrial Carcinoma, UCS-Uterine Carcinosarcoma, UVM-Uveal melanoma

**(b)** TBC1D15 (TPM)

**(c)** FACS analysis of CD133+/CD49f+ TICs from isolation of CD133/CD49f TICs from H1299 and Calu3 cells using the affinity magnetic-microbead kit.

**(d)** Western blotting for TBC1D15, NUMB, and ACTIN in isolated CD133+/CD49f+ or CD133-/CD49f- TICs.



**a**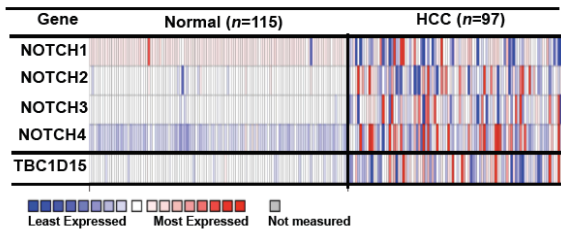**b**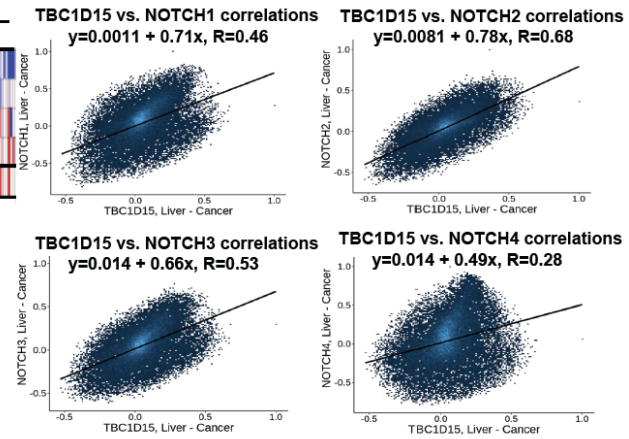

Extended Data Figure 3  
Choi *et al.*

**Supplementary Figure 3. Correlation between genome-wide co-expression correlations for TBC1D15 and NOTCH1-4 in liver cancer tissues by Correlation Analyzer R database**

(a) Co-expression analysis of NOTCHs and TBC1D15. Left panel, Genes that co-expressed with NOTCHs and TBC1D15 revealed by the Oncomine database. Range of the of mRNA expression values is represented by the color palette. Red color represents the higher expression and blue represents the lower expression of the mRNA.

(b) Scatter plot showing the relationship between genome-wide co-expression correlations for TBC1D15 and NOTCH1-4 in liver cancer tissues by Correlation Analyzer R database. Displayed R value determined by Pearson correlation.

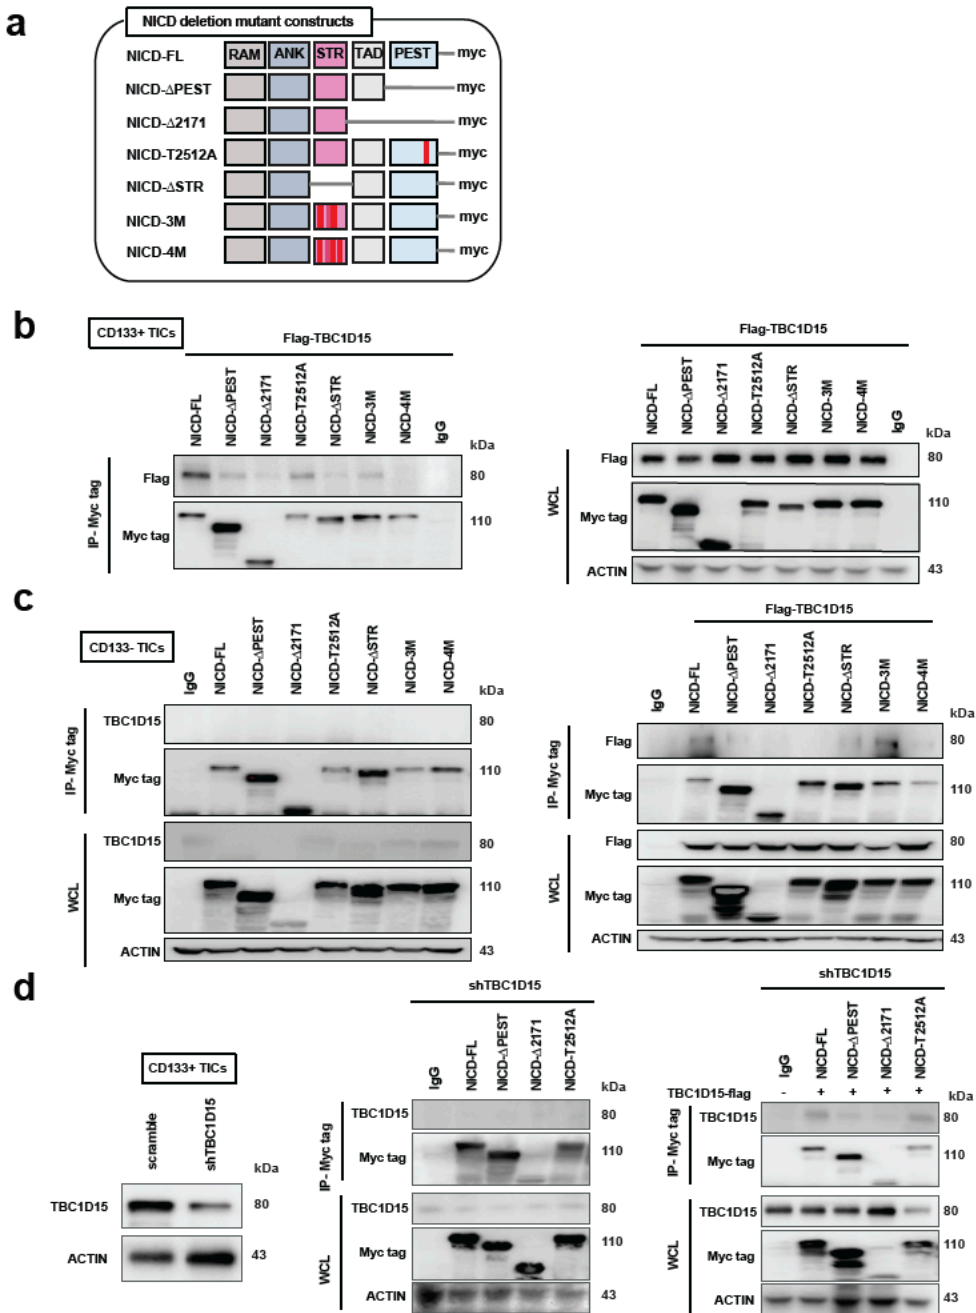

**Supplementary Figure 4. The NICD C-terminal PEST domain interacts with TBC1D15 in CD133-positive TICs.**

(a) Schematic illustration of NICD domain deletion mutant constructs. The red bars represent alanine-substitution sites for NOTCH STR phosphorylation sites.

(b) Co-IP-Western blot analysis for identified interaction domains of NICD and TBC1D15 in CD133-positive TICs with or without TBC1D15-overexpressing.

(c) Co-IP-Western blot analysis for identified interaction domains of NICD and TBC1D15 in CD133-negative TICs with or without TBC1D15-overexpressing.

(d) **Left panel**, Western blot analysis for knockdown of TBC1D15 expression in shTBC1D15 lentiviral transducing-CD133-positive TICs. **Middle panel**, Co-IP-Western blot analysis for

confirmed interaction PEST domains of NICD and TBC1D15 in shTBC1D15 lentiviral transducing-CD133-positive TICs. **Right panel**, Co-IP-Western blot analysis for confirmed interaction PEST domains of NICD and TBC1D15 in shTBC1D15 lentiviral transducing-CD133-positive TICs with TBC1D15-overexpressing.

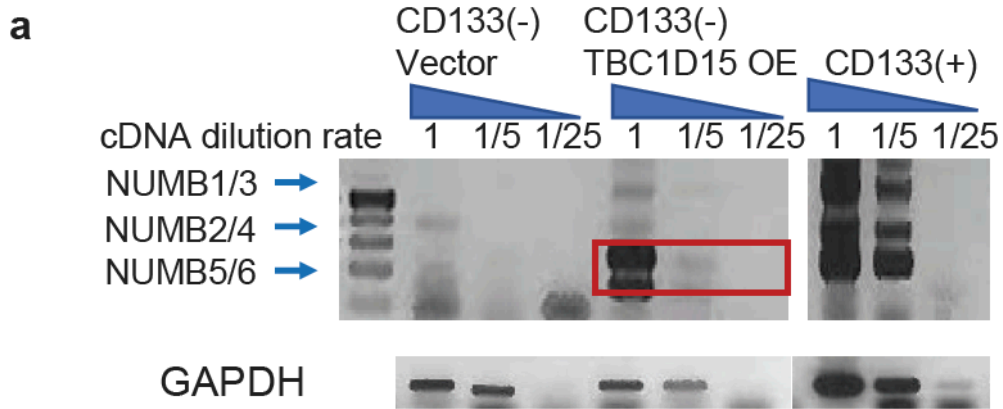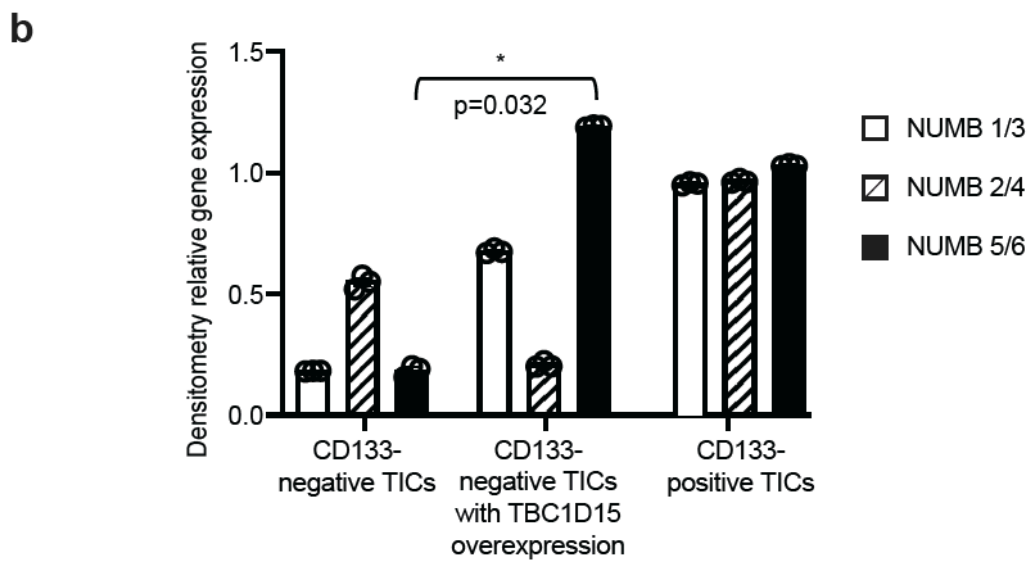

**Supplementary Figure 5. Semi-qPCR analysis of NUMB isoforms expression in TICs and non-TICs.**

(a) Semi-qPCR analysis of *NUMB* isoforms expression in indicated cells.

(b) Graph data from agarose images of semi-qPCR analysis were used for this bar graph. The densitometry quantification was done using the NIH image J program.

**CD133-negative TICs**

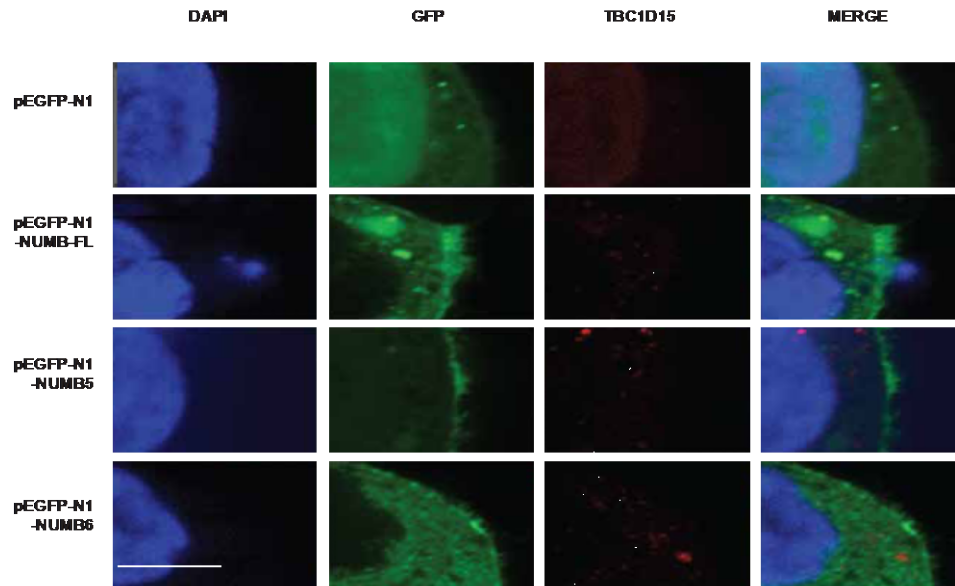

**Supplementary Figure 6. TBC1D15 and NUMB isoforms are colocalized in CD133-negative TICs.**

CD133-negative TICs was transfected with GFP-NUMB full-length, -NUMB5, and -NUMB6 and analyzed by immunofluorescence microscopy. Merge images show TBC1D15 (endogenous, red) and GFP-NUMBs (green). Scale bars: 7.4  $\mu$ m.

## Supplementary Methods

### STAR Methods

- Key Resources Table

| Reagent or Resource           | Source                         | Identifier      |
|-------------------------------|--------------------------------|-----------------|
| <b>Antibodies</b>             |                                |                 |
| Anti-Flag                     | Sigma-Aldrich                  | Cat# F1804      |
| Anti-NUMB (C29G11)            | Cell Signaling                 | Cat# 2756S      |
| Anti-NUMB (P20)               | Santa Cruz                     | Cat# SC-15590   |
| Anti-TBC1D15                  | Abcam                          | Cat# ab121396   |
| Anti-Myc-tag (9B11)           | Invitrogen                     | Cat#PA1-981     |
| Anti- $\beta$ -Actin (AC-15)  | Santa Cruz                     | Cat# SC-69879   |
| Anti-CDK8 (P455)              | Cell Signaling                 | Cat# 4106S      |
| Anti-CDK19                    | Abcam                          | Cat# ab168633   |
| Anti-Phospho-NUMB             | Cell Signaling                 | Cat# 9878S      |
| Anti-NUMB                     | Thermo Fisher scientific       | Cat# BS-3311R   |
| Anti-cleaved NOTCH1 (Val1744) | Cell Signaling                 | Cat# 4147S      |
| Anti-NOTCH1 (C-10)            | Santa Cruz                     | Cat# SC-373891  |
| Anti-c-Jun                    | Cell Signaling                 | Cat# 9165S      |
| Anti-c-Myc (A-14)             | Santa Cruz                     | Cat# SC-789     |
| Anti-CD133 epitope            | Thermo Fisher scientific       | Cat# 12-1338-42 |
| Anti-GFP (9F9.F9)             | Abcam                          | Cat# ab1218     |
| Anti-Fbxw7                    | Abcam                          | Cat# ab109617   |
| <b>Primers</b>                |                                |                 |
| NUMB Fwd                      | 5'-AGGAATGCACATCTGTGAAG-3'     |                 |
| NUMB Rev                      | 5'-CTCAGAGGGAGTACGTCTAT-3'     |                 |
| ACTIN Fwd                     | 5'-ACCCACACTG TGCCCATCTACGA-3' |                 |
| ACTIN Rev                     | 5'-CAGCGGAACCGCTCATTGCCAAT-3'  |                 |
| <b>Chemicals and Reagents</b> |                                |                 |
| Normal Goat serum             | Thermo Fisher Scientific       |                 |
| FBS                           | GeminiBio                      |                 |
| 1X NEAA                       | Gibco-BRL                      |                 |
| Glutamax-1                    | Gibco-BRL                      | Cat# 35050-061  |
| Antibiotic-Antimycotic        | Thermo Fisher Scientific       |                 |
| EMEM                          | Gibco-BRL                      |                 |

|                                                                                                |                                            |                  |
|------------------------------------------------------------------------------------------------|--------------------------------------------|------------------|
| DMEM                                                                                           | Sigma-Aldrich                              |                  |
| Triple                                                                                         | Gibco-BRL                                  | Cat# 12563-029   |
| DAPI                                                                                           | Invitrogen                                 |                  |
| Triton X-100                                                                                   | Invitrogen                                 |                  |
| 10X PBS                                                                                        | Invitrogen                                 |                  |
| Para-formaldehyde                                                                              | Sigma-Aldrich                              |                  |
| Protease inhibitor                                                                             | Invitrogen                                 |                  |
| 6X Laemmli sample buffer                                                                       | Bioland                                    | Cat# SAB03-02    |
| CD133 isolation kit                                                                            | Miltenyi Biotec                            | Cat# AC133       |
| Protein A/G bead                                                                               | Santa Cruz                                 | Cat# SC-2003     |
| 40% Acrylamide/Bis solution<br>(29:1)                                                          | Bio-Rad                                    | Cat# 1610146     |
| Glutathione-Sepharose 4B bead                                                                  | GE Healthcare                              |                  |
| DTT                                                                                            | Sigma-Aldrich                              |                  |
| Lysozyme                                                                                       | Sigma-Aldrich                              |                  |
| IPTG                                                                                           | Sigma-Aldrich                              | Cat# 420291      |
| HEPES                                                                                          |                                            |                  |
| Anti-Flag M2 Affinity gel                                                                      | Thermo Fisher Scientific                   | Cat# A2220       |
| Flag peptide                                                                                   | Sigma-Aldrich                              |                  |
| MACS LS columns                                                                                | Miltenyi Biotec                            | Cat# 130-042-401 |
| RPMI 1640 Medium                                                                               | Gibco-BRL                                  | Cat# 11875       |
| TRIzol                                                                                         | Thermo Fisher Scientific                   | Cat# 15596026    |
| TEMED                                                                                          | VWR Life science                           | Cat# 110-18-9    |
| BSA (Bovine Serum Albumin)                                                                     | VWR Life science                           | Cat# 9048-46-8   |
| Agarose                                                                                        | Fisher Scientific                          | Cat# 9012-36-6   |
| Methanol                                                                                       | VWR Life science                           | Cat# 67-56-1     |
| Donkey anti-Mouse IgG (H+L)<br>Highly Cross-Adsorbed<br>Secondary Antibody, Alexa Fluor<br>488 | Thermo Fisher Scientific                   | Cat# A-21202     |
| Goat anti-Rabbit IgG (H+L)<br>Highly Cross-Adsorbed<br>Secondary Antibody, Alexa Fluor<br>568  | Thermo Fisher Scientific                   | Cat# A-11036     |
| Rabbit anti-Goat IgG (H+L)<br>Cross-Adsorbed Secondary<br>Antibody, Alexa Fluor 488            | Thermo Fisher Scientific                   | Cat# A-11078     |
| CompactPrep Plasmid Midi Kit                                                                   | QIAGEN                                     | Cat# 12843       |
| SuperSep™ Phos-tag™ 7.5%                                                                       | FUJIFILM Wako Pure<br>Chemical Corporation | Cat# 192-18001   |
| PRKCZ (PKC ZETA)                                                                               | Thermo Fisher Scientific                   | Cat# P2268       |
| CDK8/CYCLIN C                                                                                  | Thermo Fisher Scientific                   | Cat# PV4402      |
| MiniElute PCR purification kit                                                                 | QIAGEN                                     | Cat# 28004       |
| DNeasy Blood and Tissue kit                                                                    | QIAGEN                                     | Cat# 69504       |

|                           |                        |                 |
|---------------------------|------------------------|-----------------|
| Cas9-D10A Nickase Protein | Sigma                  | Cat# CAS9D10APR |
|                           |                        |                 |
|                           |                        |                 |
| Bio T                     | Bioland Scientific LLC | B01-01          |
|                           |                        |                 |

| <b>Recombinant DNA</b>                             |                 |                                    |
|----------------------------------------------------|-----------------|------------------------------------|
| p3X-Flag-TBC1D15-full length                       |                 |                                    |
| p3X-Flag-TBC1D15-N terminal                        |                 |                                    |
| pcDNA3-N1ICD-myc                                   |                 |                                    |
| pcDNA3- $\Delta$ PEST-myc                          |                 |                                    |
| pcDNA3- $\Delta$ 2171-myc                          |                 |                                    |
| pcDNA3- $\Delta$ STR-myc                           |                 |                                    |
| pcDNA3-3M<br>(S2122A/T2133A/S2137A)-myc            |                 |                                    |
| pcDNA3-4M<br>(S2122A/T2133A/S2137A/S2142<br>A)-myc |                 |                                    |
| pcDNA3-PEST-S2490A-myc                             | This paper      | N/A                                |
| pcDNA3-PEST-S2493A-myc                             | This paper      | N/A                                |
| pcDNA3-PEST-S2500A-myc                             | This paper      | N/A                                |
| pcDNA3-PEST-S2514A-myc                             | This paper      | N/A                                |
| pcDNA3-PEST-S2514E-myc                             | This paper      | N/A                                |
| pcDNA3-PEST-T2512E-myc                             | This paper      | N/A                                |
| pcDNA3-PEST-T2512A-myc                             |                 |                                    |
| pGEX-GST-NUMB-full length                          | Kaibuchi lab    | Mol Biol Cell 2011, 22(17):3103-19 |
| pGEX-GST-PTB                                       | Kaibuchi lab    | Mol Biol Cell 2011, 22(17):3103-19 |
| pGEX-GST-PRR/1                                     | Kaibuchi lab    | Mol Biol Cell 2011, 22(17):3103-19 |
| pGEX-GST-PRR/2                                     | Kaibuchi lab    | Mol Biol Cell 2011, 22(17):3103-19 |
| pGEX-GST-PRR/3                                     | Kaibuchi lab    | Mol Biol Cell 2011, 22(17):3103-19 |
| NUMB4-eGFP-M107K                                   | Addgene         | Cat #37805                         |
| pEGFP-N1-NUMB5                                     | Karaczyn<br>lab | Neural Dev 2010, 5:31              |
| pEGFP-N1-NUMB6                                     | Karaczyn<br>lab | Neural Dev 2010, 5:31              |
| pEGFP-N1                                           | Karaczyn<br>lab | Neural Dev 2010, 5:31              |
| pGreen-puro-TBC1D15                                | This paper      | N/A                                |
| pBabe-puro-CDK8-Flag                               | Addgene         | Cat #19758                         |
| pBabe-puro-CDK8-KD-Flag                            | Addgene         | Cat #19759                         |
| p3X-Flag-FBW7a                                     |                 |                                    |

## Software



|                      |                               |                                                                                                                       |
|----------------------|-------------------------------|-----------------------------------------------------------------------------------------------------------------------|
| Adobe Photoshop 2020 | Adobe                         |                                                                                                                       |
| Adobe illustrator    | Adobe                         |                                                                                                                       |
| ImageJ               | NIH                           | <a href="https://imagej.nih.gov/ij/">https://imagej.nih.gov/ij/</a>                                                   |
| Prism8               | Graphpad                      | <a href="https://www.graphpad.com/scientific-software/prism/">https://www.graphpad.com/scientific-software/prism/</a> |
| Enrichr              | Ma'ayan Lab                   | <a href="https://maayanlab.cloud/Enrichr/">https://maayanlab.cloud/Enrichr/</a>                                       |
| UCSC Genome Brower   | UCSC<br>Genomics<br>Institute | <a href="http://www.genome.ucsc.edu">http://www.genome.ucsc.edu</a>                                                   |

---

- **RESOURCE AVAILABILITY**

- **Material Availability**

The unique materials and reagents created in this study are available upon request from the lead representative along with a completed Material Transfer Agreement.

- **Data and Code Availability**

The ChIP-seq datasets generated during this study are available at Enrichr.

- **EXPERIMENTAL MODEL AND SUBJECT DETAILS**

**Mouse studies**

All experiments on mice were approved by the USC Institutional Animal Care and Use Committee. All mice were raised in a specific pathogen-free environment at the University of Southern California Keck School of Medicine. All surgeries were performed under deep anesthesia, and all efforts were made to minimize suffering. Tbc1d15 Fl/Fl: Ns5aTg transgenic mice will be crossbred with LysM-Cre mice to obtain single-positive offspring or double-positive transgenic mice. LysM-Cre:Tbc1d15 Fl/Fl transgenic mice will be further crossbred with Ns5a Tg mice to obtain triple-positive offspring or double-positive transgenic mice.

Mice were anesthetized with isoflurane and skin was sterilized with iodophor three times before surgery. For the intrahepatic inoculation of TBC1D15 KO (sgTBC1D15 232, 260,295) cells, the surgery was conducted on left lobes along the left rib edge.  $2 \times 10^5$  Hepa1-6 cells were suspended in 50  $\mu$ l PBS and injected into left lobes of the liver with a syringe at 30° angle. The injection site was gently pressed with cotton balls to reduce bleeding and leakage of cell suspensions afterwards. Then, the peritoneum and skin were closed with 4–0 sutures.

**Cells**

Human hepatoma cell line (Huh7) and transformed liver cell line (Hep3B) were obtained from ATCC (Manassas, VA). Cells were cultured in growth media [Dulbecco's modified Eagle's medium (DMEM, Sigma-Aldrich) with 10% fetal bovine serum (FBS, GeminiBio), 0.1% non-essential amino acid (Gibco-BRL), 1% Glutamax-1 (Gibco-BRL) and 1% penicillin/streptomycin (P/S, Gibco-BRL)]. Cells were cultured

with Eagle's Minimum Essential Medium (Gibco-BRL) containing 1% Glutamax-1, 1% P/S, and 10% FBS. Isolation of CD133-positive/negative cells were performed on Huh7, Hep3B and H1299 cell lines using magnetic-microbeads conjugated with CD133 (AC133, Cell isolation Kit, Miltenyi Biotec). Magnetic separation was performed twice. CD133-positive cells were cultured in growth media as described above. The quality of isolating was controlled by flow cytometry with an antibody against a different CD133 epitope (Santacruz Biotechnology).

### **Cell transfection**

Transfection of cells was performed using BioT (Bioland Scientific LLC.) at a transfection reagent:DNA ratio of 3:1 for 48 hours. For HEK293A cells, BioT was used for 72 hours according to manufacturer's instructions.

### **Immuno-precipitation, and Immunoblot**

Cells were co-transfected with Flag-tag TBC1D15 full-length constructs together with Myc-tag NICD full-length or deletion mutants ( $\Delta$ PEST,  $\Delta$ 2171, T2512A,  $\Delta$ STR, 3M, and 4M; from Dr. Del Sal), Myc-tag FBW7 full-length (Addgene). And cells were transfected with Flag-tag TBC1D15 full-length, Myc-tag NICD full-length or deletion mutants, Myc-tag FBW7 full-length, Myc-tag PEST mutants (S2490A, S2493A, S2500A, T2512A, S2514A, T2512E, S2514E) constructs. Bio T was used as the transfection reagent (Bioland Scientific LLC). After 48 hours transfection, cells were harvested with Triple solution (Invitrogen) and lysed in lysis buffer (50mM Tris-Cl, pH 7.5, 150mM NaCl, 1% NP-40, 0.1% SDS) supplemented with protease inhibitors (Invitrogen), incubated on ice for 30 min, and cleared by centrifugation at 13,000 rpm at 4°C for 10 min. For immuno-precipitation, protein lysate was incubated 2 hours in 4°C with primary antibodies [1 mg of antibody as indicated, or isotype control antibodies; anti-Flag tag (Sigma-Aldrich) or anti-Myc tag (Invitrogen)] on a rotation device. Protein A/G beads (Santacruz Biotechnologies) were pre-cleared for 1 hour in 4°C and added protein lysate with primary antibodies for 1 hour in 4°C on a rotation device. After 1 hour, protein A/G beads were pulled down and three times washed with 1X PBS (Invitrogen) and boiled in 6 X Laemmli sample buffer (Bioland) for 5 min. And the precipitants subjected to SDS-PAGE and immunoblot, and protein analysis by nitrocellulose membrane (Invitrogen). Immunoprecipitation was performed at least twice per cell line.

### **Immunofluorescence Staining**

Cells were transfected with EGFP-N1, EGFP-NUMB4, EGFP-NUMB5, and EGFP-NUMB6 constructs by Bio T. After 48 hours transfection, cells were fixed by 4% paraformaldehyde (Sigma-Aldrich) for 15 min at room temperature. Cells were blocked with 10% normal goat serum (Invitrogen) with 0.25% Triton X-100 (Invitrogen) in PBS for 1 hour on shaker, and then incubated with primary antibodies [anti-TBC1D15 (1:1,000) and anti-NOTCH1 (Cell signaling, 1:500)] overnight at 4°C followed by the appropriate secondary fluorescently labeled antibodies [anti-rabbit (1:1,000), anti-mouse (1:1,000), and anti-goat (1:1,000); Molecular Probe] for 1 hour at room temperature on shaker. Nuclei were counterstained with DAPI (Sigma-Aldrich). Images were acquired using a confocal microscope (Leica).

### **Production of Lentivirus**

Lentivirus constructs [sh-Scramble and sh-TBC1D15] and assemble particles were generated by co-transfecting sub-confluent HEK-293T cells with lentivirus construct along with the psPAX2 packaging vector and an envelope vector (pMD2.G). Lentivirus was collected from the culture media at 72 hours post-transfection and purified by ultracentrifugation (Beckman, SW 28 rotor) with 25,000 rpm for 2 hours at 4°C. Lentivirus pellets were resuspended in de-ionized water and stored at -80°C until use. Cells were transduced with lentivirus in presence of polybrene (5 mg/ml). Lentivirus transduced-cells were selected in culture media containing puromycin (Gibco-BRL, 1 mg/ml).

### **Quantitative real-time PCR**

Total RNA was isolated using the ISOLATE II RNA Mini Kit (Bioline) as per manufacturer's instructions and reverse transcribed to cDNA using oligo(dT) nucleotides and SuperScript III Reverse Transcriptase (Thermo Fisher Scientific). Quantitative real-time PCR was performed using Advanced Taq (Thermo Fisher Scientific) on Bio-Rad PCR system. Primers were designed using the Integrated DNA Technologies online tool and listed in the Key Resources Table.

### **Purification of Recombinant Proteins**

To purified GST-tag NUMB constructs (NUMB full-length, NUMB-PTB, NUMB-PRR1, NUMB-PRR2, and NUMB-PRR3), BL21 E. coli (EMD Millipore) harboring the pGEX vector were cultured at 37°C until reaching A600=0.6, then induced with 0.5 mM IPTG (Sigma-Aldrich) and grown for an additional 3 hours at 30°C. Bacterial pellets were resuspended in ice-cold bacterial lysis buffer [0.5% Triton X-100, 1 mM DTT (Sigma-Aldrich), 0.2 mg/ml lysozyme (Sigma-Aldrich) in PBS] for 1 hour, then sonicated three times in 30-s pulses with 1 min on ice between pulses. Following a centrifugation (12,000 rpm, 5 min) the supernatant was recovered and purified on Glutathione-Sepharose 4B beads (GE Healthcare). To purify flag-tag TBC1D15, HEK-293A cells grown to 70-80% confluence was transfected with flag-tag TBC1D15. After 72 hours post-transfection, cells were washed once with cold PBS, and lysed in 1ml cold lysis buffer (10 mM HEPES pH 7.5, 10 mM KCl, 1.5 mM MgCl<sub>2</sub>, 0.5% NP-40) for 1 hour on ice, followed by centrifugation at 13,000 rpm for 10 min and recovery of the supernatant. Immunoprecipitations were performed by incubating 1 ml supernatant with 40 µl of a 40% slurry of M2 anti-Flag agarose (Invitrogen) for 2 hours at 4°C with rotating. Beads were washed once in buffer W (20 mM Tris pH 7.3, 300 mM NaCl, 0.5% triton X-100, 2% glycerol), once in PBS containing 0.2% Triton X-100, and once in PBS. Flag-tag TBC1D15 was eluted by incubation in Flag peptide (1 mg/ml, Sigma-Aldrich) overnight at 4°C. The samples were stored at -80°C in PBS containing 5% glycerol and 1 mM DTT.

### ***In vitro* Protein Interaction assay**

Purified GST-NUMB constructs (NUMB full-length, NUMB-PTB, NUMB-PRR1, NUMB-PRR2, and NUMB-PRR3) were immobilized onto Glutathione-Sepharose 4B beads. The beads were incubated with purified flag-tag TBC1D15 protein for 1 hour

at 4°C. Then the beads were washed three times, eluted by boiling in 6 X Laemmli sample buffer for SDS-PAGE, and subjected to immunoblot analysis with anti-Flag or anti-TBC1D15 antibodies.

### **Immunohistochemistry**

In immunohistochemical (IHC) analysis, tissue slides were deparaffinized, rehydrated through an alcohol series followed by antigen retrieval with sodium citrate buffer. Tumor sections were blocked with 5% normal goat serum and 0.1% Triton X-100 in PBS for 60 min at room temperature and then incubated with appropriate antibodies at 4°C overnight. IHC staining was performed with horseradish peroxidase (HRP) conjugates using DAB detection.

- **QUANTIFICATION AND STATISTICAL ANALYSIS**

All quantitative experiments have been repeated using at least three independent biological repeats. Unpaired Student's t test was used for two-group comparisons. All grouped data are presented as mean  $\pm$  SD or mean  $\pm$  SEM. Statistical comparisons between two groups were accessed by two-tailed student's t-test. GraphPad Prism Software (GraphPad Software, Inc.) was used to examine statistical significance.

- **DATA AND SOFTWARE AVAILABILITY**

The list of software for data analysis and processing can be found in the Key Resources Table.

### **Cell transfection**

Transfection of cells was performed using BioT (Bioland Scientific LLC.) at a transfection reagent: DNA ratio of 3:1 for 48 hours. According to the manufacturer's instructions, for HEK293A cells, BioT was used for 72 hours.

### **Quantitative Real-time PCR**

Total RNA was isolated using the ISOLATE II RNA Mini Kit (Bioline) as per the manufacturer's instructions and reverse transcribed to cDNA using oligo(dT) nucleotides and SuperScript III Reverse Transcriptase (Thermo Fisher Scientific). Quantitative real-time PCR was performed using Advanced Taq (Thermo Fisher Scientific) on a Bio-Rad PCR system. Primers were designed using the Integrated DNA Technologies online tool and listed in below.

*NUMB* Fwd 5'-AGGAATGCACATCTGTGAAG-3', Rev 5'-CTCAGAGGGAGTACGTCTAT-3';  
*ACTIN* Fwd 5'-ACCCACACTG TGCCCATCTACGA-3', Rev 5'-  
CAGCGGAACCGCTCATTGCCAAT-3'; *SLC25A16* Fwd 5'-  
AATCATTGTCTTTTCAGTACCATGCG-3', Rev 5'-ATGGCAACCTCTTGAACCCC-3'; *FIS1* Fwd  
5'-CTTAAAGTACGTCCGCGGGT-3', Rev 5'-CCGCGTCTCCTTCAGGATTT-3'; *ATP5B* Fwd 5'-  
CTGGTGTGTTGGTGAGAGGACC-3', Rev 5'-TGGGCAAACGTAGTAGCAGG-3'; *MRPS10* Fwd 5'-  
AATGGTGGCTTGCTTCTCAGT-3', Rev 5'-GGAGCAGTTAGGGCAGACTC-3'.

### **Purification of Recombinant Proteins**

To purified GST-tag NUMB constructs (NUMB full-length, NUMB-PTB, NUMB-PRR1, NUMB-PRR2, and NUMB-PRR3), BL21 E. coli (EMD Millipore) harboring the pGEX vector were cultured at 37°C until reaching A600=0.6, then induced with 0.5 mM IPTG (Sigma-Aldrich) and grown for an additional 3 hours at 30°C. Bacterial pellets were resuspended in ice-cold bacterial lysis buffer [0.5% Triton X-100, 1 mM DTT (Sigma-Aldrich), 0.2 mg/ml lysozyme (Sigma-Aldrich) in PBS] for 1 hour, then sonicated three times in 30-s pulses with 1 min on ice between pulses. Following

centrifugation (12,000 rpm, 5 min), the supernatant was recovered and purified on Glutathione-Sepharose 4B beads (GE Healthcare). To purify flag-tag TBC1D15, HEK-293A cells grown to 70-80% confluence were transfected with flag-tag TBC1D15. After 72 hours post-transfection, cells were washed once with cold PBS and lysed in 1ml cold lysis buffer (10 mM HEPES pH 7.5, 10 mM KCl, 1.5 mM MgCl<sub>2</sub>, 0.5% NP-40) for 1 hour on ice, followed by centrifugation at 13,000 rpm for 10 min and recovery of the supernatant. Immunoprecipitations were performed by incubating 1 ml supernatant with 40 µl of a 40% slurry of M2 anti-Flag agarose (Invitrogen) for 2 hours at 4°C with rotating. Beads were washed once in buffer W (20 mM Tris pH 7.3, 300 mM NaCl, 0.5% Triton X-100, 2% glycerol), once in PBS containing 0.2% Triton X-100, and once in PBS. Flag-tag TBC1D15 was eluted by incubating Flag peptide (1 mg/ml, Sigma-Aldrich) overnight at 4°C. The samples were stored at -80°C in PBS containing 5% glycerol and 1 mM DTT.

### ***In vitro* Protein Interaction assay**

Purified GST-NUMB constructs (NUMB full-length, NUMB-PTB, NUMB-PRR1, NUMB-PRR2, and NUMB-PRR3) were immobilized onto Glutathione-Sepharose 4B beads. The beads were incubated with purified flag-tag TBC1D15 protein for 1 hour at 4°C. Then the beads were washed three times, eluted by boiling in 6 X Laemmli sample buffer for PAGE, and subjected to immunoblot analysis with anti-Flag or anti-TBC1D15 antibodies.

### **Mitochondria fraction**

According to the manufacturer's instruction, the mitochondria, nucleus, and cytoplasm fraction was performed using the Mitochondria Isolation Kit (Thermo Fisher Scientific). Briefly, the cells were lysed with 1 ml of ice-cold lysis buffer, and then cells were homogenized with a 26G syringe 30 times on the ice. The homogenates lysates were centrifuged for 10 min at 1500x g to obtain a nucleus fraction. The supernatant obtained was centrifuged for 10 min at 10,000xg, the supernatant contained the cytoplasm fraction, and the pellet contained the crude mitochondrial fraction.

### **Cell-based ubiquitylation assay**

Cultured cells were lysed with a lysis buffer (120 mM NaCl, 50 mM HEPES (pH7.2), 1 mM EDTA (pH 8.0), 1% NP-40, 0.5% sodium deoxycholic acid (Sigma-Aldrich), 10 mM N-ethylmaleimide (Sigma-Aldrich), and protease inhibitor cocktail for 30 min on ice. The lysates were centrifuged at 20,000 × g for 10 min at 4°C. Then 1% SDS was added to the lysates, then heated at 95°C for 10 min and diluted 5-fold with the lysis buffer. Myc-tagged NICD-FL, NICD-T2512E, and NICD-T2512A mutants were immunoprecipitated with anti-Myc-tag at 4°C overnight, respectively. Immuno-precipitates were analyzed by immunoblotting to detect ubiquitylated.

### **Immunohistochemistry**

In immunohistochemical (IHC) analysis, tissue slides were deparaffinized, rehydrated through an alcohol series followed by antigen retrieval with sodium citrate buffer. Tumor sections were blocked with 5% normal goat serum and 0.1% Triton X-100 in PBS for 60 min at room temperature and then incubated with appropriate antibodies at 4°C overnight. IHC staining was performed with horseradish peroxidase (HRP) conjugates using DAB detection.

### **Intrahepatic Injection**

Prepare mice for surgery in a chamber supplying 5% (v/v) inhaled Isoflurane in 1 L/min of oxygen. For intrahepatic xenografting, shave the ventral thorax and abdomen of the animals from the axillae down to the inguinal region and cleanse the skin with 70% ethanol. Using a 27 G 1/2 needle on a 1 ml syringe, administer 350 µl of sterile standard saline solution subcutaneously in the dorsum of the anesthetized animal's neck to compensate for intraoperative fluid losses. For analgesia, administer 350 µl of sterile normal saline containing buprenorphine (0.1 mg/kg) subcutaneously on the animal's flank, using a 27 G 1/2-in needle on a 1 ml syringe. Place the mouse supine on a pre-heated pad with the nose and mouth positioned inside the mouthpiece to deliver maintenance inhalational isoflurane anesthesia (2% (v/v) in 1 L/min O<sub>2</sub>).

Extend the limbs and secure them with tape to the operating surface to optimize the ventral abdomen and thorax exposure. Perform the procedure under a magnifying lamp to optimize visualization. Sterilize the shaved skin on the ventral abdomen and thorax with Betadine surgical scrub followed by 70% ethanol and lastly with povidone-iodine solution. Using sterile sharp scissors, make a transverse bilateral subcostal skin incision and divide the muscle layers to enter the peritoneal cavity to allow adequate exposure of the entire liver. Place a stitch in the skin above the xiphoid process and secure it to the mouthpiece with tape to better expose the liver and surrounding structures. Load the tumor cell suspension (prepared in step 1.13) into an insulin syringe using a 29 G 1/2 needle. With the liver stabilized using a cotton-tip applicator, insert the insulin syringe needle into the liver and advance the tip a few millimeters beyond the puncture site along a subcapsular plane. Gently discharge the contents of the syringe and then remove the needle from the liver. Place Surgical over the puncture site and apply gentle pressure with a cotton-tipped applicator to prevent leakage of the tumor cell suspension and achieve complete hemostasis. Close the incision with sutures and provide postoperative care. Remove the mouse from the inhalational anesthesia mouthpiece. Place the mouse in a cage under a heat lamp for approximately 20 min until recovered from anesthesia and mobilizing fully. Repeat the buprenorphine dose every 8-12 hours during the first 2-3 postoperative days.

### **Immunofluorescence Staining**

Cells were transfected with EGFP-N1, EGFP-NUMB-FL, EGFP-NUMB5, and EGFP-NUMB6 constructs by Bio T. After 48 hours of transfection; cells were fixed by 4% paraformaldehyde (Sigma-Aldrich) for 15 min at room temperature. Cells were blocked with 10% normal goat serum (Invitrogen) with 0.25% Triton X-100 (Invitrogen) in PBS for 1 hour on shaker, and then incubated with primary antibodies [anti-TOM20 (1:1,000), anti-TBC1D15 (1:1,000) and anti-NOTCH1 (Cell signaling, 1:500)] overnight at 4°C followed by the appropriate secondary fluorescently labeled antibodies [anti-rabbit (1:1,000), anti-mouse (1:1,000), and anti-goat (1:1,000); Molecular Probe] for 1 hour at room temperature on shaker. Nuclei were counterstained with DAPI (Sigma-Aldrich). Images were acquired using a confocal microscope (Leica).

### **Immunoprecipitation and Immunoblot**

Cells were co-transfected with Flag-tag TBC1D15 full-length constructs together with Myc-tag NICD full-length or deletion mutants ( $\Delta$ PEST,  $\Delta$ 2171, T2512A,  $\Delta$ STR, 3M, and 4M), Flag-tag FBW7 full-length. And cells were transfected with Flag-tag TBC1D15 full-length, Myc-tag NICD full-length or deletion mutants, Myc-tag FBW7 full-length, Myc-tag PEST mutants (S2490A, S2493A, S2500A, T2512A, S2514A, T2512E, S2514E) constructs. Bio T was used as the transfection reagent (Bioland Scientific LLC). After 48 hours of transfection, cells were harvested with Triple solution (Invitrogen) and lysed in lysis buffer (50mM Tris-Cl, pH 7.5, 150mM NaCl, 1% NP-40, 0.1% SDS) supplemented with protease inhibitors (Invitrogen), incubated on ice for 30 min, and cleared by centrifugation at 13,000 rpm at 4°C for 10 min. For immunoprecipitation, protein lysate was incubated 2 hours in 4°C with primary antibodies [1 mg of the antibody as indicated, or isotype control antibodies; anti-Flag tag (Sigma-Aldrich) or anti-Myc tag (Invitrogen)] on a rotation device. Protein A/G beads (Santacruz Biotechnologies) were pre-cleared for 1 hour at 4°C and added protein lysate with primary antibodies for 1 hour at 4°C on a rotation device. After 1 hour, protein A/G beads were pulled down and three times washed with 1X PBS (Invitrogen) and boiled in 6 X Laemmli sample buffer (Bioland) for 5 min. And the precipitants were subjected to SDS-PAGE, immunoblot, and protein analysis by blotting onto nylon membrane. Immunoprecipitation was performed at least twice per cell line.

### **Mitochondria assessment**

Mitochondria were identified by size and staining using the TOM20 outer membrane of the mitochondria-specific antibody and then analyzed using Graphpad Prism (version 8.0) and ImageJ.

### **Production of Lentivirus**

Lentivirus constructs [sh-Scramble and sh-TBC1D15] and assemble particles were generated by co-transfecting sub-confluent HEK-293T cells with a lentivirus construct along with the psPAX2 packaging vector and an envelope vector (pMD2.G). Lentivirus was collected from the culture media at 72 hours post-transfection and purified by ultracentrifugation (Beckman, SW 28 rotor) with 25,000 rpm for 2 hours at 4°C. Lentivirus pellets were resuspended in de-ionized water and stored at -80°C until use. Cells were transduced with lentivirus in the presence of polybrene (5 mg/ml). Lentivirus transduced cells were selected in culture media containing puromycin (Gibco-BRL, 1 mg/ml).
